# Supplementary material
Source: publisher figshare collection journal article supplement (https://future-science-group.figshare.com/ndownloader/files/35084569)

**Supplementary Material**

NOVEL TRYPANOCIDAL THIOPHEN-CHALCONE CRUZAIN INHIBITORS: STRUCTURE- AND LIGAND-BASED STUDIES

Authors

Affiliations

Table Index

| **Table S1.** Experimental pIC50 values for the chalcones used for the QSAR study [22]…….….... | 4 |
| --- | --- |
| **Table S2.** Pharmacokinetics parameters for C8 and BZ………………………………………… | 6 |

Figure Index

| **Figure S1.** Correlation between Goldscore values and IC50 values against cruzain…………….. | 7 |
| --- | --- |
| **Figure S2.** 1H NMR spectrum (200 MHz, CDCl3) of *(E)-3-(5-chlorothiophen-2-yl)-1-phenylprop-2-en-1-one* **(C1)**…………………………………………………….. | 8 |
| **Figure S3.** 13C NMR spectrum (50 MHz, CDCl3) of *(E)-3-(5-chlorothiophen-2-yl)-1-phenylprop-2-en-1-one* **(C1)**…………………………………………………….. | 9 |
| **Figure S4.** 1H NMR spectrum (200 MHz, CDCl3) of *(E)-1,3-bis(5-chlorothiophen-2-yl)prop-2-en-1-one* **(C2)** …………………………………………………………………. | 10 |
| **Figure S5.** 13C NMR spectrum (50 MHz, CDCl3) of *(E)-1,3-bis(5-chlorothiophen-2-yl)prop-2-en-1-one* **(C2)** …………………………………………………………………… | 11 |
| **Figure S6.** 1H NMR spectrum (200 MHz, CDCl3) of (E)-3-(5-chlorothiophen-2-yl)-1-(4-methoxyphenyl)prop-2-en-1-one (**C3**)…………………………………………... | 12 |
| **Figure S7.** 13C NMR spectrum (50 MHz, CDCl3) of (E)-3-(5-chlorothiophen-2-yl)-1-(4-methoxyphenyl)prop-2-en-1-one (**C3**) ………………………………………….. | 13 |
| **Figure S8.** 1H NMR spectrum (200 MHz, CDCl3) of *(E)-3-(5-chlorothiophen-2-yl)-1-(4-methylphenyl)prop-2-en-1-one* **(C4)** ……………………………………………. | 14 |
| **Figure S9.** 13C NMR spectrum (50 MHz, CDCl3) of *(E)-3-(5-chlorothiophen-2-yl)-1-(4-methylphenyl)prop-2-en-1-one* **(C4)** ……………………………………………. | 15 |
| **Figure S10.** 1H NMR spectrum (200 MHz, CDCl3) of *(E)-3-(5-chlorothiophen-2-yl)-1-(3-nitrophenyl)prop-2-en-1-one* **(C5)** ……………………………………………… | 16 |
| **Figure S11.** 13C NMR spectrum (50 MHz, CDCl3) of *(E)-3-(5-chlorothiophen-2-yl)-1-(3-nitrophenyl)prop-2-en-1-one* **(C5)** ……………………………………………… | 17 |
| **Figure S12.** 1H NMR spectrum (200 MHz, CDCl3) of *(E)-3-(5-chlorothiophen-2-yl)-1-(4-nitrophenyl)prop-2-en-1-one* **(C6)** ……………………………………………… | 18 |
| **Figure S13.** 13C NMR spectrum (50 MHz, CDCl3) of *(E)-3-(5-chlorothiophen-2-yl)-1-(4-nitrophenyl)prop-2-en-1-one* **(C6)** ……………………………………………… | 19 |
| **Figure S14.** 1H NMR spectrum (200 MHz, CDCl3) of *(E)-1-(4-bromophenyl)-3-(5-chlorothiophen-2-yl)prop-2-en-1-one* **(C7)** …………………………………… | 20 |
| **Figure S15.** 13C NMR spectrum (50 MHz, CDCl3) of *(E)-1-(4-bromophenyl)-3-(5-chlorothiophen-2-yl)prop-2-en-1-one* **(C7)** …………………………………… | 21 |
| **Figure S16.** DEPT spectrum of *(E)-1-(4-bromophenyl)-3-(5-chlorothiophen-2-yl)prop-2-en-1-one* **(C7)** ………………………………………………………………………… | 22 |
| **Figure S17.** 1H NMR spectrum (200 MHz, CDCl3) of *(E)-3-(5-chlorothiophen-2-yl)-1-(2,4,5-trimetoxyphenyl)prop-2-en-1-one* **(C8)** …………………………………………. | 23 |
| **Figure S18.** 13C NMR spectrum (50 MHz, CDCl3) of *(E)-3-(5-chlorothiophen-2-yl)-1-(2,4,5-trimetoxyphenyl)prop-2-en-1-one* **(C8)** …………………………………………. | 24 |
| **Figure S19.** 1H NMR spectrum (200 MHz, CDCl3) of *(E)-3-(5-chlorothiophen-2-yl)-1-(2,4,6-trimetoxyphenyl)prop-2-en-1-one* **(C9)** …………………………………………. | 25 |
| **Figure S20.** 13C NMR spectrum (50 MHz, CDCl3) of *(E)-3-(5-chlorothiophen-2-yl)-1-(2,4,6-trimetoxyphenyl)prop-2-en-1-one* **(C9)** …………………………………………. | 26 |
| **Figure S21.** 1H NMR spectrum (200 MHz, CDCl3) of *(E)-3-(5-chlorothiophen-2-yl)-1-(3,4,5-trimetoxyphenyl)prop-2-en-1-one* **(C10)** ………………………………………... | 27 |
| **Figure S22.** 13C NMR spectrum (50 MHz, CDCl3) of *(E)-3-(5-chlorothiophen-2-yl)-1-(3,4,5-trimetoxyphenyl)prop-2-en-1-one* **(C10)** ………………………………………... | 28 |
| **Figure S23.** 1H NMR spectrum (200 MHz, CDCl3) of *(E)-1-(1,3-benzodioxol-5-yl)-3-(5-chlorothiophen-2-yl)prop-2-en-1-one* **(C11)** ……………………………………. | 29 |
| **Figure S24.** 13C NMR spectrum (50 MHz, CDCl3) of *(E)-1-(1,3-benzodioxol-5-yl)-3-(5-chlorothiophen-2-yl)prop-2-en-1-one* **(C11)** ……………………………………. | 30 |
| **Figure S25.** 1H NMR spectrum (200 MHz, CDCl3) of *(E)-3-(5-chlorothiophen-2-yl)-1-(naphtalen-1-yl)prop-2-en-1-one* **(C12)** ………………………………………… | 31 |
| **Figure S26.** 13C NMR spectrum (50 MHz, CDCl3) of *(E)-3-(5-chlorothiophen-2-yl)-1-(naphtalen-1-yl)prop-2-en-1-one* **(C12)** ………………………………………… | 32 |
| **Figure S27.** 1H NMR spectrum (200 MHz, CDCl3) of *(E)-3-(5-chlorothiophen-2-yl)-1-(2,5-dimethoxyphenyl)prop-2-en-1-one* **(C13)** ……………………………………….. | 33 |
| **Figure S28.** 13C NMR spectrum (50 MHz, CDCl3) of *(E)-3-(5-chlorothiophen-2-yl)-1-(2,5-dimethoxyphenyl)prop-2-en-1-one* **(C13)** ……………………………………….. | 34 |
| **Figure S29.** 1H NMR spectrum (200 MHz, CDCl3) of *(E)-3-(5-chlorothiophen-2-yl)-1-(3,4-dimethoxyfenyl)prop-2-en-1-one* **(C14)** ………………………………………… | 35 |
| **Figure S30.** 13C NMR spectrum (50 MHz, CDCl3) of *(E)-3-(5-chlorothiophen-2-yl)-1-(3,4-dimethoxyfenyl)prop-2-en-1-one* **(C14)** ………………………………………… | 36 |
| **Figure S31.** 1H NMR spectrum (200 MHz, CDCl3) of *(E)-3-(5-chlorothiophen-2-yl)-1-(3-methoxyphenyl)prop-2-en-1-one* **(C15)** …………………………………………. | 37 |
| **Figure S32.** 13C NMR spectrum (50 MHz, CDCl3) of *(E)-3-(5-chlorothiophen-2-yl)-1-(3-methoxyphenyl)prop-2-en-1-one* **(C15)** …………………………………………. | 38 |
| **Figure S33.** 1H NMR spectrum (200 MHz, CDCl3) of *(E)-3-(5-chlorothiophen-2-yl)-1-(naphtalen-2-yl)prop-2-en-1-one* **(C16)** ………………………………………… | 39 |
| **Figure S34.** 13C NMR spectrum (50 MHz, CDCl3) of *(E)-3-(5-chlorothiophen-2-yl)-1-(naphtalen-2-yl)prop-2-en-1-one* **(C16)** ………………………………………… | 40 |
| **Figure S35.** 1H NMR spectrum (200 MHz, CDCl3) of *(E)-3-(5-chlorothiophen-2-yl)-1-(2,5-chlorothiophenyl)prop-2-en-1-one* **(C17)** ………………………………………. | 41 |
| **Figure S36.** 13C NMR spectrum (50 MHz, CDCl3) of *(E)-3-(5-chlorothiophen-2-yl)-1-(2,5-chlorothiophenyl)prop-2-en-1-one* **(C17)** ………………………………………. | 42 |

**Table S1.** Experimental pIC50 values for the chalcones used for the QSAR study [22].

| **Compound** | **Structure** | **Experimental pIC50** |
| --- | --- | --- |
| **1** | 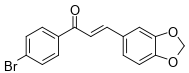 | 4.0000 |
| **2** | 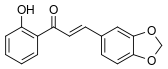 | 4.4318 |
| **3** | 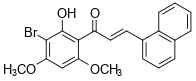 | 5.6527 |
| **4** | 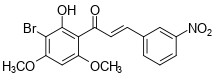 | 5.7086 |
| **5** | 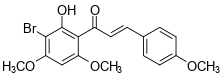 | 5.7272 |
| **6** | 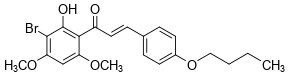 | 5.7706 |
| **7** | 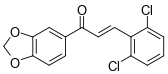 | 5.8365 |
| **8** | 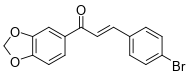 | 5.9318 |
| **9** | 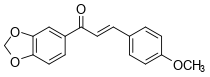 | 6.0595 |
| **10** | 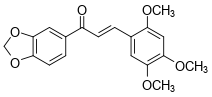 | 4.0000 |
| **11** | 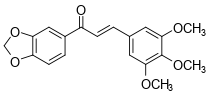 | 4.2218 |
| **12** | 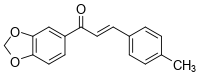 | 4.3010 |
| **13** | 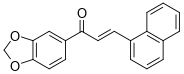 | 4.3010 |
| **14** | 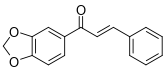 | 4.3010 |
| **15** | 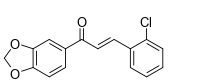 | 4.3010 |
| **16** | 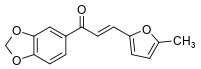 | 4.3010 |
| **17** | 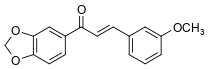 | 4.3188 |
| **18** | 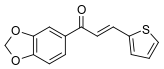 | 4.3372 |
| **19** | 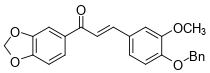 | 4.3468 |
| **20** | 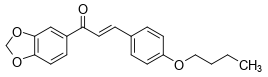 | 4.4559 |
| **21** | 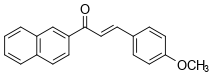 | 4.5229 |
| **22** | 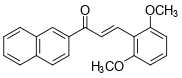 | 4.5229 |
| **23** | 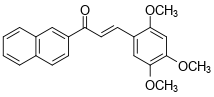 | 4.6021 |
| **24** | 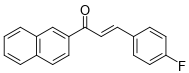 | 4.6021 |
| **25** | 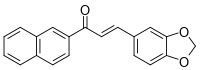 | 4.6021 |
| **26** | 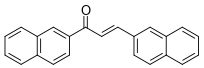 | 4.6021 |
| **27** | 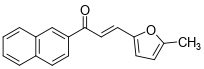 | 4.6021 |
| **28** | 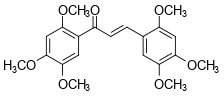 | 4.6990 |
| **29** | 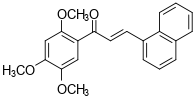 | 4.6990 |
| **30** | 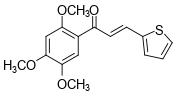 | 5.6868 |
| **31** | 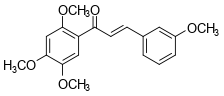 | 5.6885 |
| **32** | 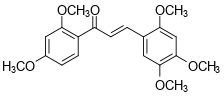 | 5.6895 |
| **33** | 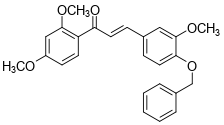 | 4.0000 |

**Table S2.** Pharmacokinetics parameters* for **C8** and BZ.

| **Property** | **Model Name** | **Compounds** | |
| --- | --- | --- | --- |
| **BZ** | **C8** |
| Absorption | Water solubility (log mol/L) | -2.723 | -2.892 |
| Caco-2 permeability (log Papp in 10−6 cm/s) | 0.655 | 0.881 |
| Intestinal absorption – human (% Absorbed) | 75.494 | 85.574 |
| SkinPermeability (log Kp) | -2.735 | -2.735 |
| P-glycoprotein substrate | Yes | No |
| P-glycoprotein I inhibitor | No | No |
| P-glycoprotein II inhibitor | No | No |
| Distribution | Human ssVD (log L/kg) | 0.234 | -0.035 |
| BBB permeability (log BB) | -0.863 | -0.531 |
| CNS permeability (log PS) | -2.69 | -1.118 |
| Metabolism | CYP2D6 substrate | No | No |
| CYP3A4 substrate | No | No |
| CYP1A2 inhibitor | No | Yes |
| CYP2C19 inhibitor | No | No |
| CYP2C9 inhibitor | No | No |
| CYP2D6 inhibitor | No | No |
| CYP3A4 inhibitor | No | No |
| Excretion | Total Clearance (log mL/min/kg) | 0.519 | 0.203 |
| Renal OCT2 substrate | No | No |
| Toxicity | AMES toxicity | No | Yes |
| Human max. tolerated dose (log mg/kg/day) | 1.029 | 0.438 |
| hERG I inhibitor | No | No |
| hERG II inhibitor | No | No |
| Oral Rat Acute Toxicity LD50 (mol/kg) | 2.365 | 2.482 |
| Oral Rat Chronic Toxicity LOAEL (log mg/kg bw/day) | 1.682 | 9.814 |
| Hepatotoxicity | Yes | No |
| SkinSensitization | No | No |
| *T pyriformis* toxicity (log µg/L) | 0.285 | 0.285 |
| Minnow toxicity (log mM) | 2.06 | 7.432 |

* Data obtained by the pkCSM platform.

**Figure S1.** Correlation between Goldscore values and IC50 values against cruzain.


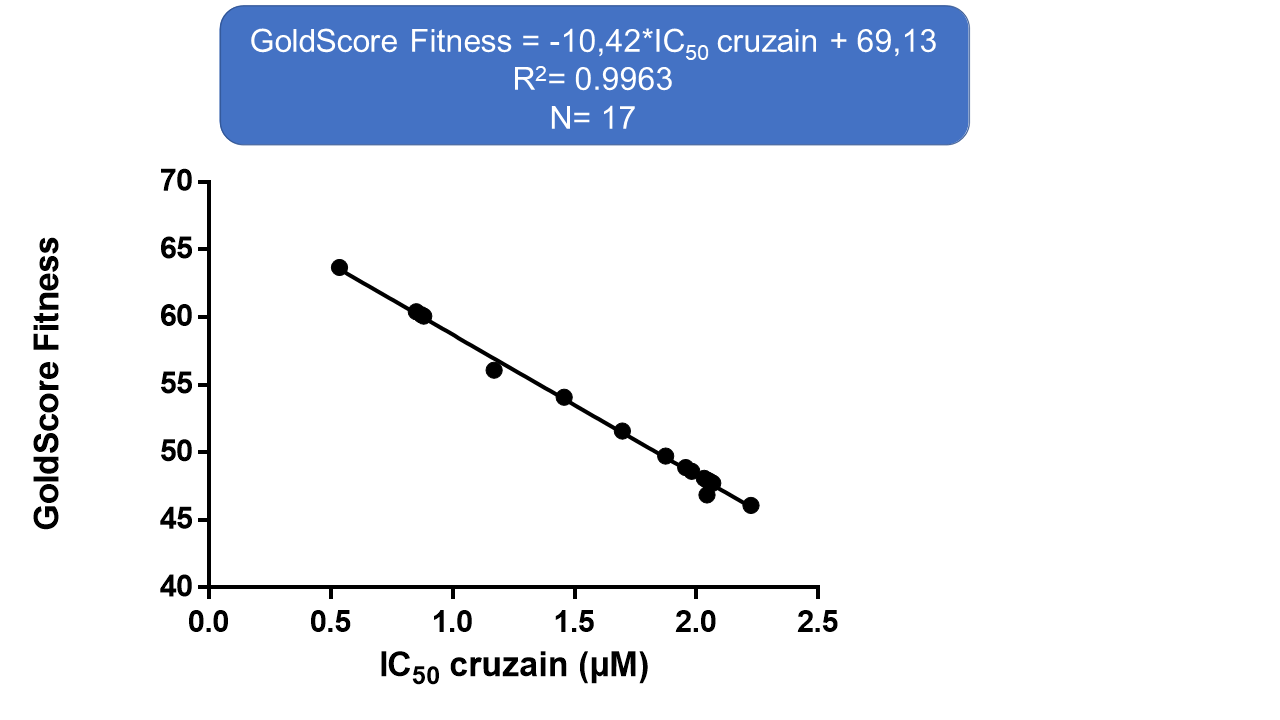


**Figure S2.** 1H NMR spectrum (200 MHz, CDCl3) of *(E)-3-(5-chlorothiophen-2-yl)-1-phenylprop-2-en-1-one* **(C1)**


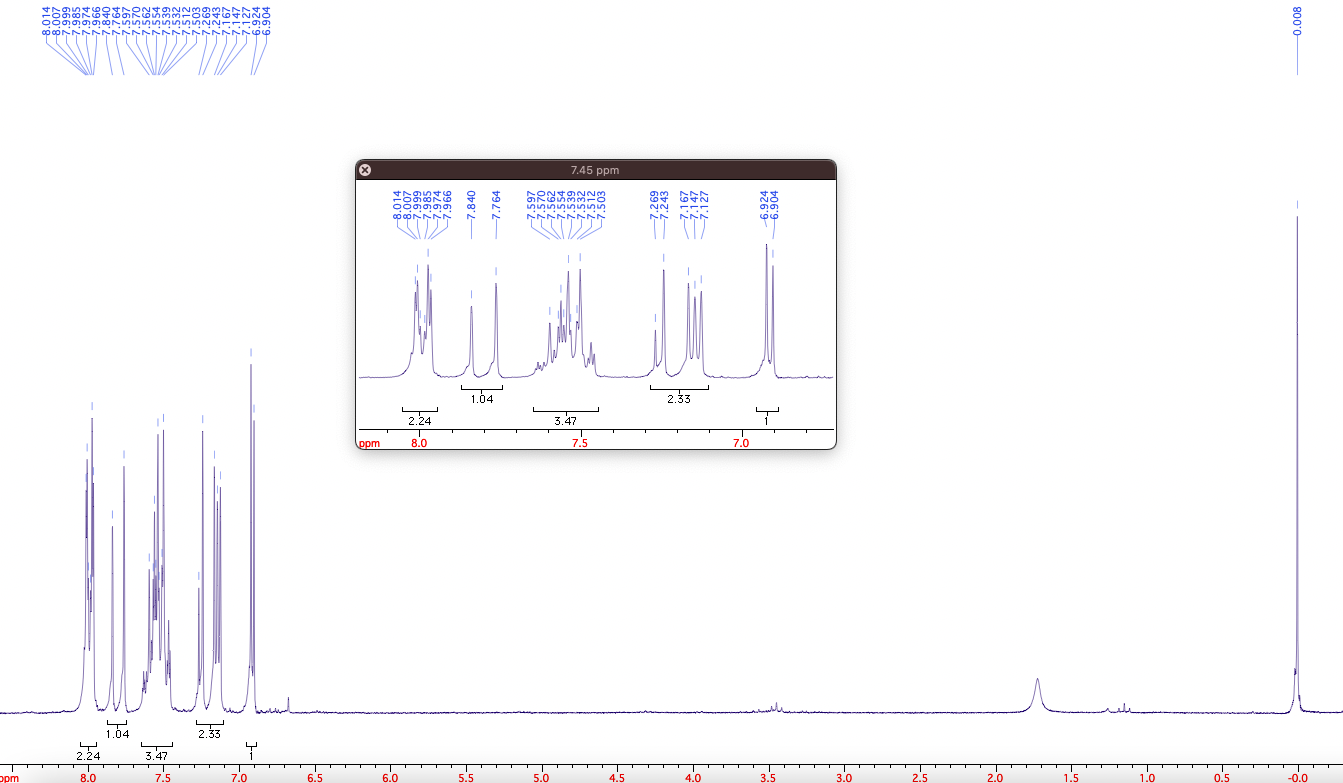


**Figure S3.** 13C NMR spectrum (50 MHz, CDCl3) of *(E)-3-(5-chlorothiophen-2-yl)-1-phenylprop-2-en-1-one* **(C1)**


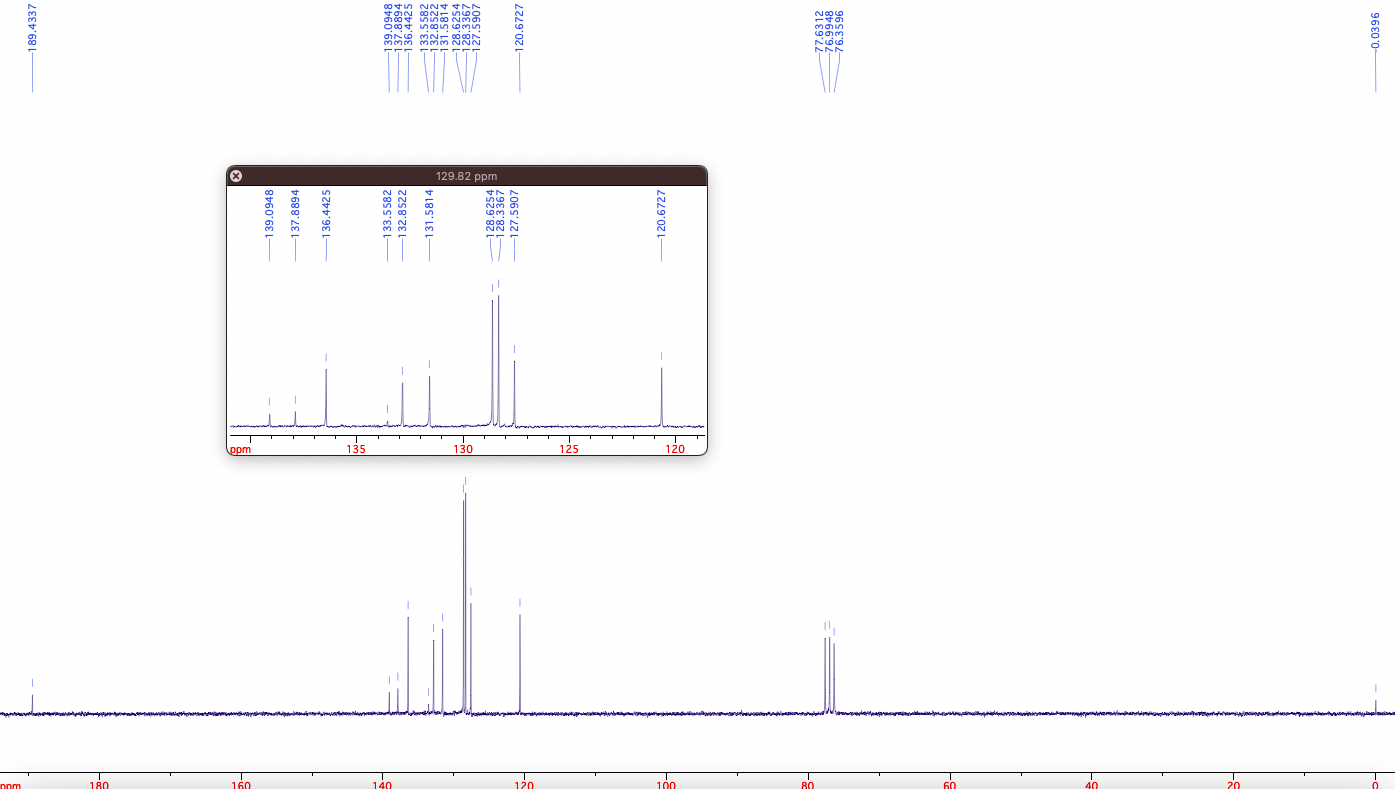


**Figure S4.** 1H NMR spectrum (200 MHz, CDCl3) of *(E)-1,3-bis(5-chlorothiophen-2-yl)prop-2-en-1-one* **(C2)**


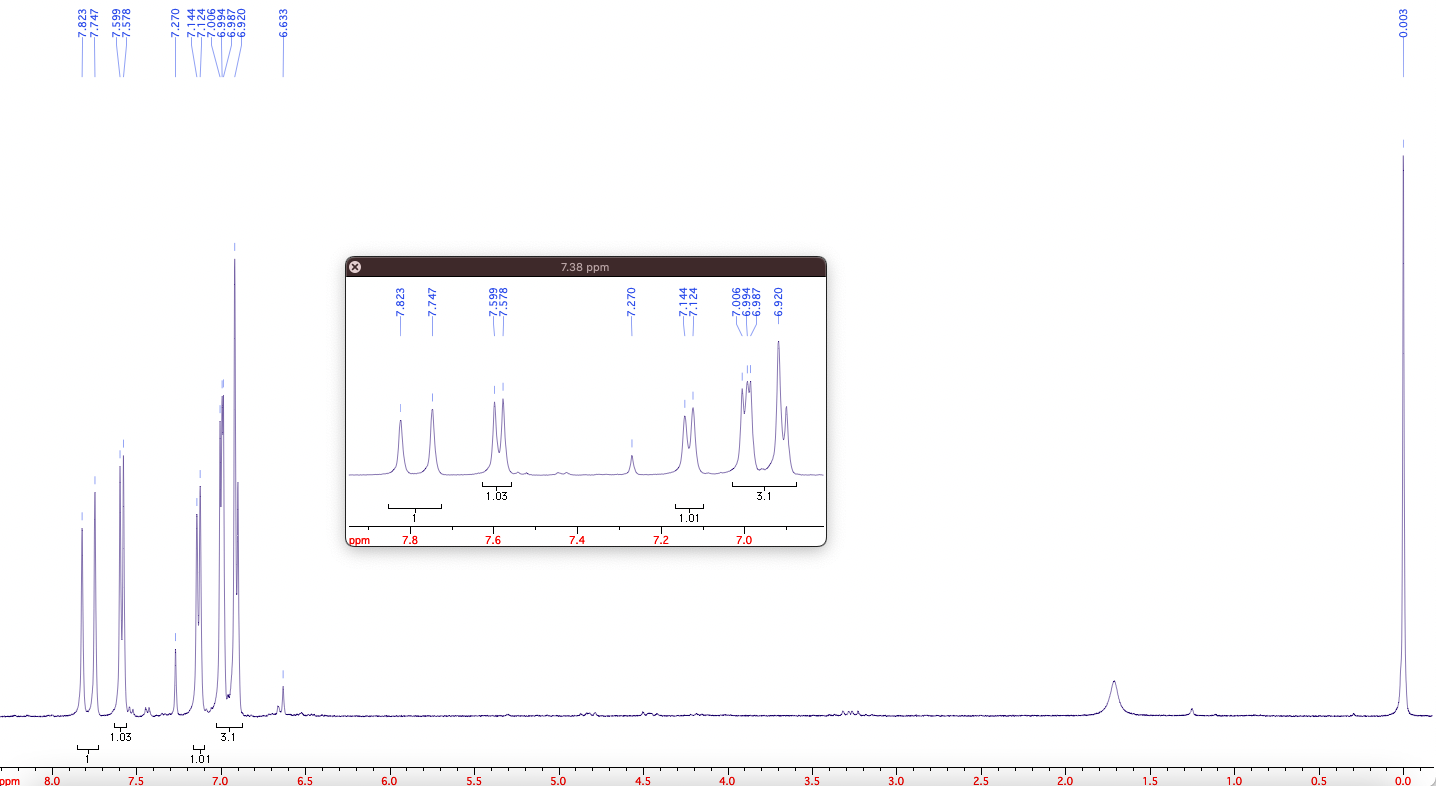


**Figure S5.** 13C NMR spectrum (50 MHz, CDCl3) of *(E)-1,3-bis(5-chlorothiophen-2-yl)prop-2-en-1-one* **(C2)**


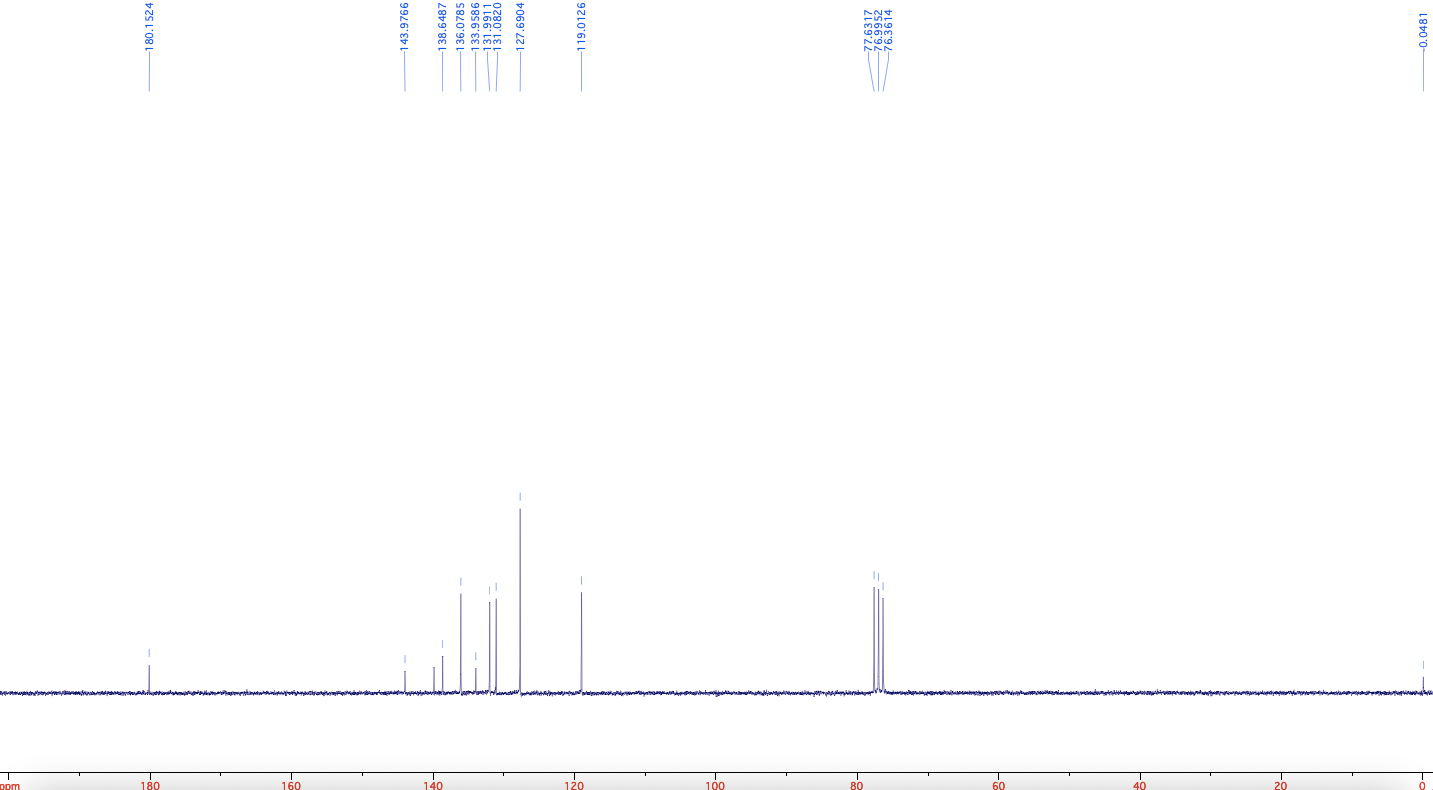


**Figure S6.** 1H NMR spectrum (200 MHz, CDCl3) of (E)-3-(5-chlorothiophen-2-yl)-1-(4-methoxyphenyl)prop-2-en-1-one (**C3**)


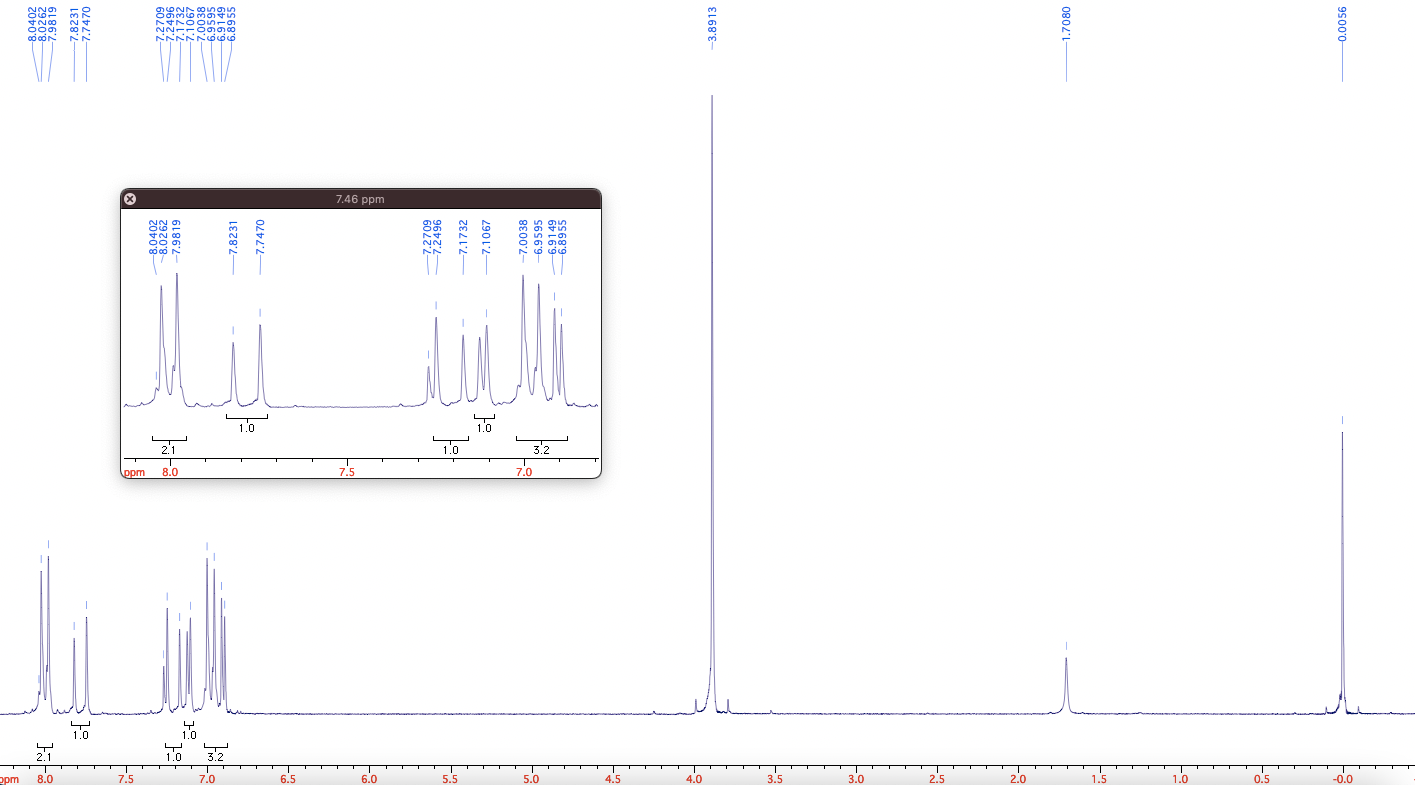


**Figure S7.** 13C NMR spectrum (50 MHz, CDCl3) of (E)-3-(5-chlorothiophen-2-yl)-1-(4-methoxyphenyl)prop-2-en-1-one (**C3**)


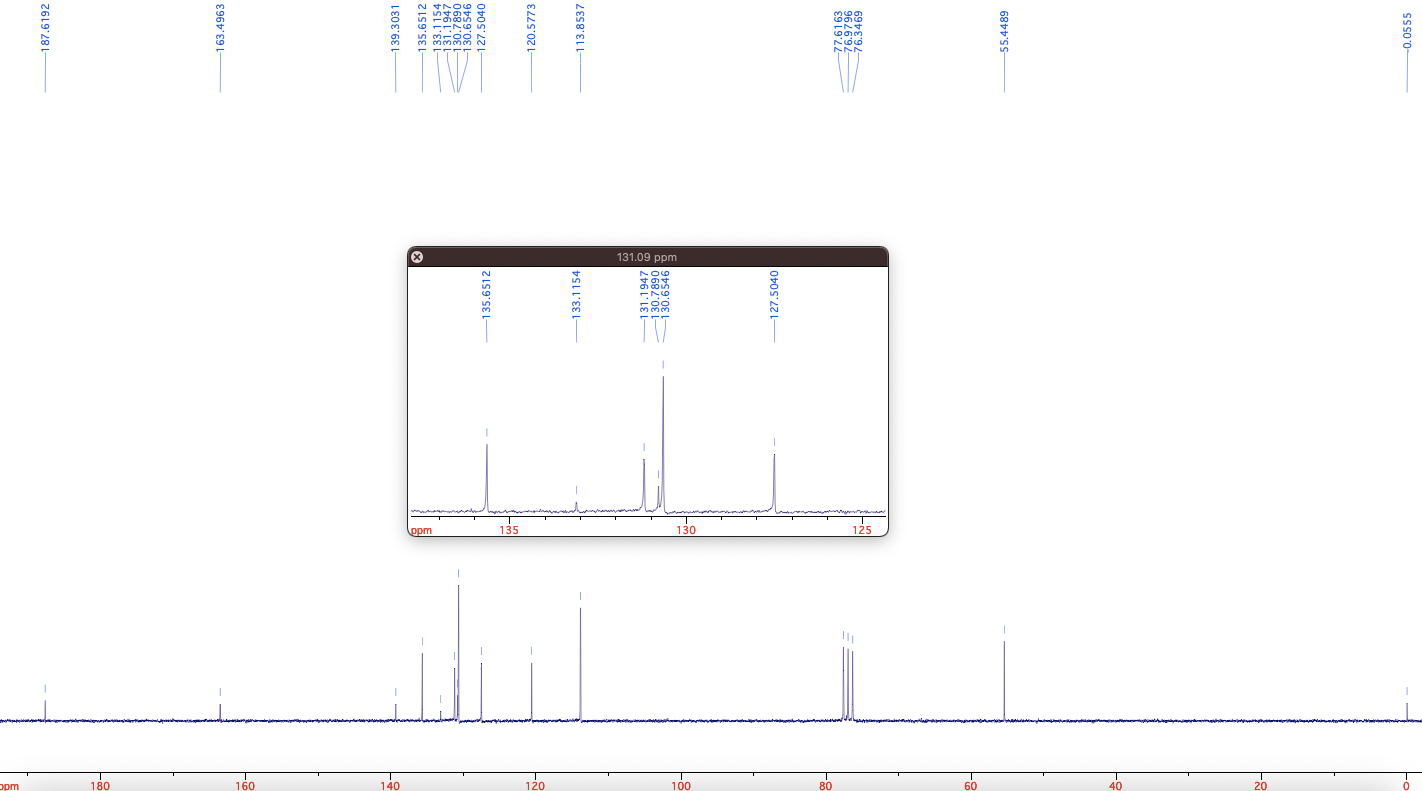


**Figure S8.** 1H NMR spectrum (200 MHz, CDCl3) of *(E)-3-(5-chlorothiophen-2-yl)-1-(4-methylphenyl)prop-2-en-1-one* **(C4)**


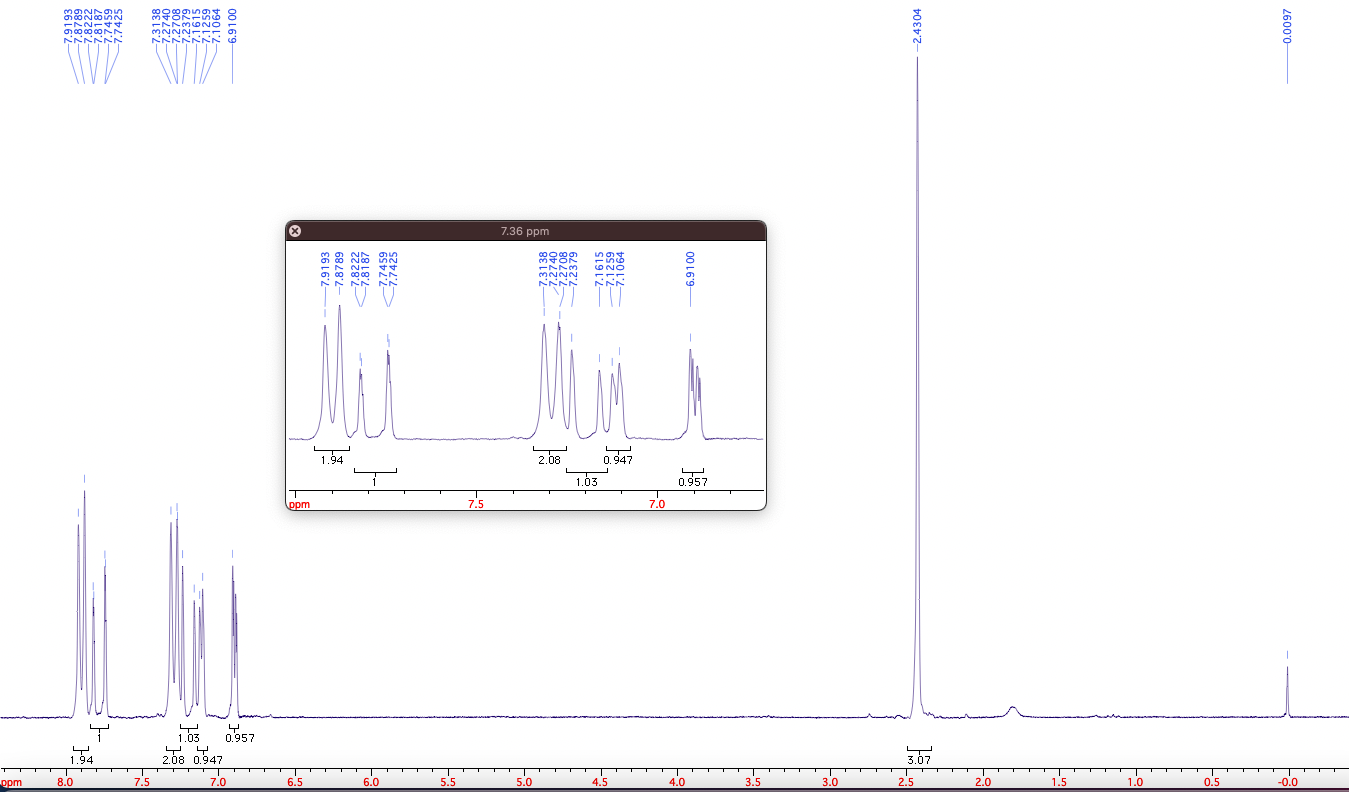


**Figure S9.** 13C NMR spectrum (50 MHz, CDCl3) of *(E)-3-(5-chlorothiophen-2-yl)-1-(4-methylphenyl)prop-2-en-1-one* **(C4)**


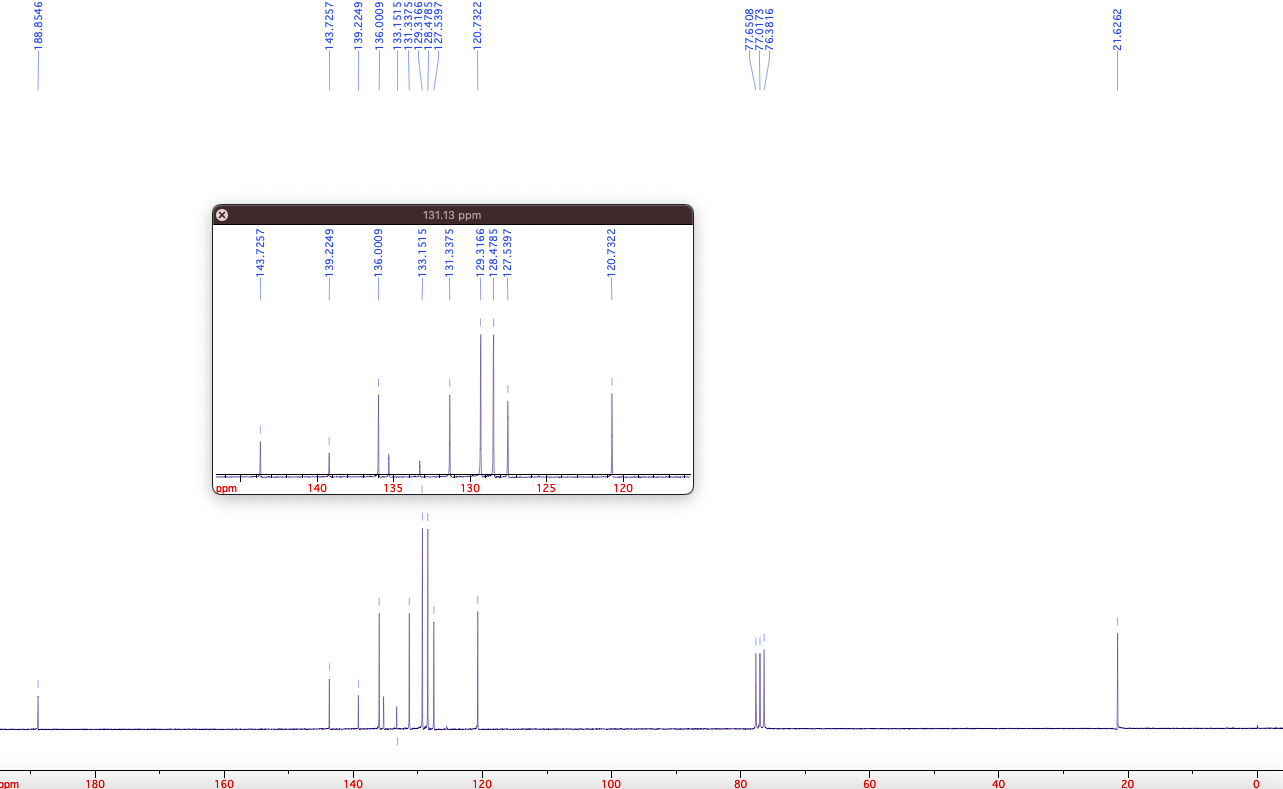


**Figure S10.** 1H NMR spectrum (200 MHz, CDCl3) of *(E)-3-(5-chlorothiophen-2-yl)-1-(3-nitrophenyl)prop-2-en-1-one* **(C5)**


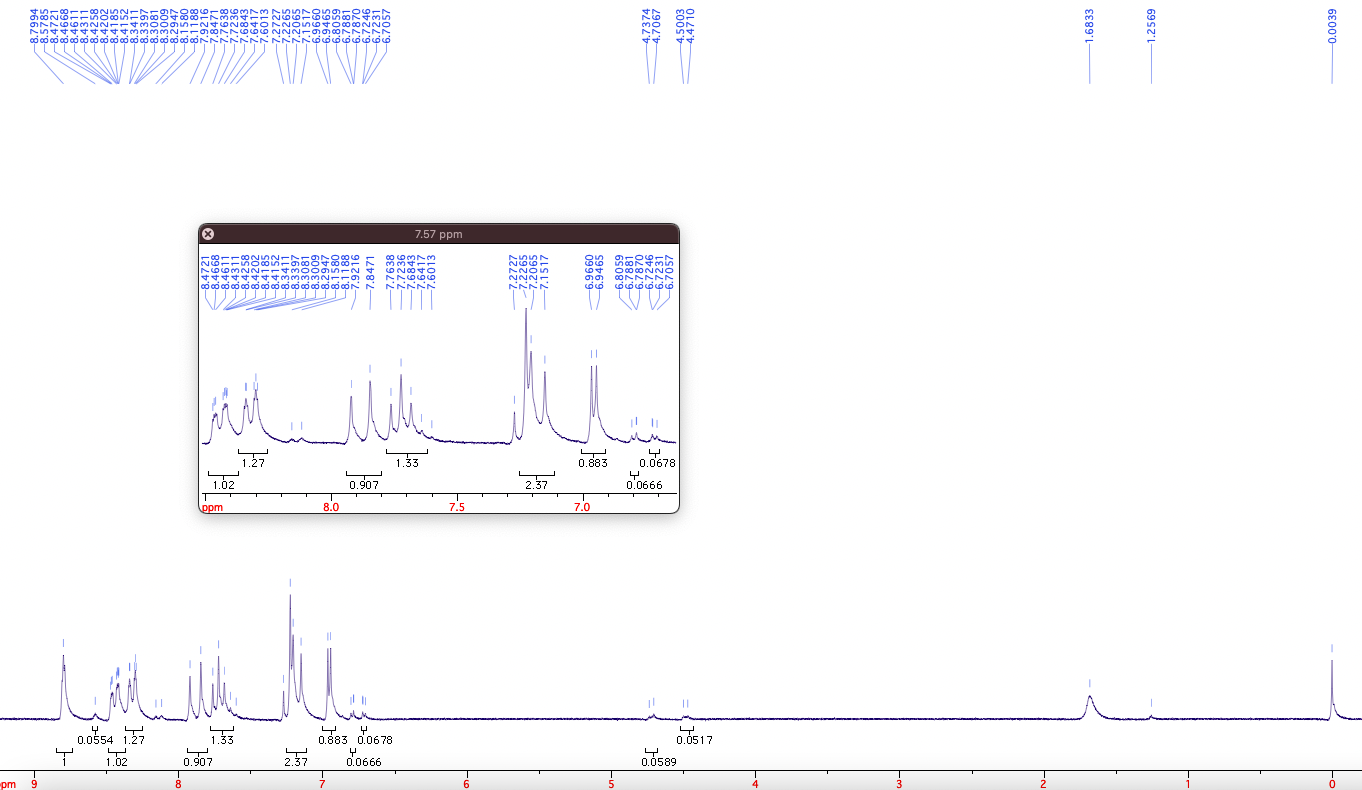


**Figure S11.** 13C NMR spectrum (50 MHz, CDCl3) of *(E)-3-(5-chlorothiophen-2-yl)-1-(3-nitrophenyl)prop-2-en-1-one* **(C5)**


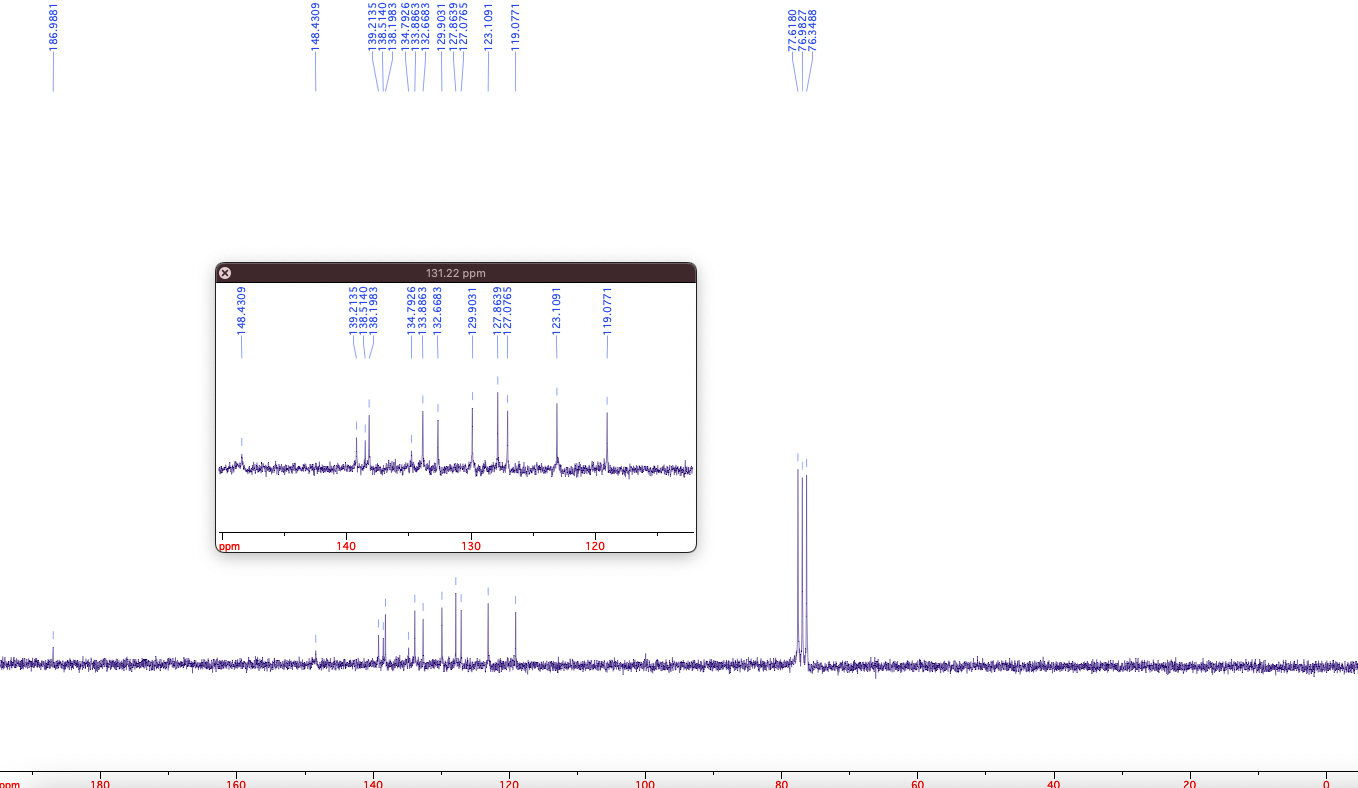


**Figure S12.** 1H NMR spectrum (200 MHz, CDCl3) of *(E)-3-(5-chlorothiophen-2-yl)-1-(4-nitrophenyl)prop-2-en-1-one* **(C6)**

**
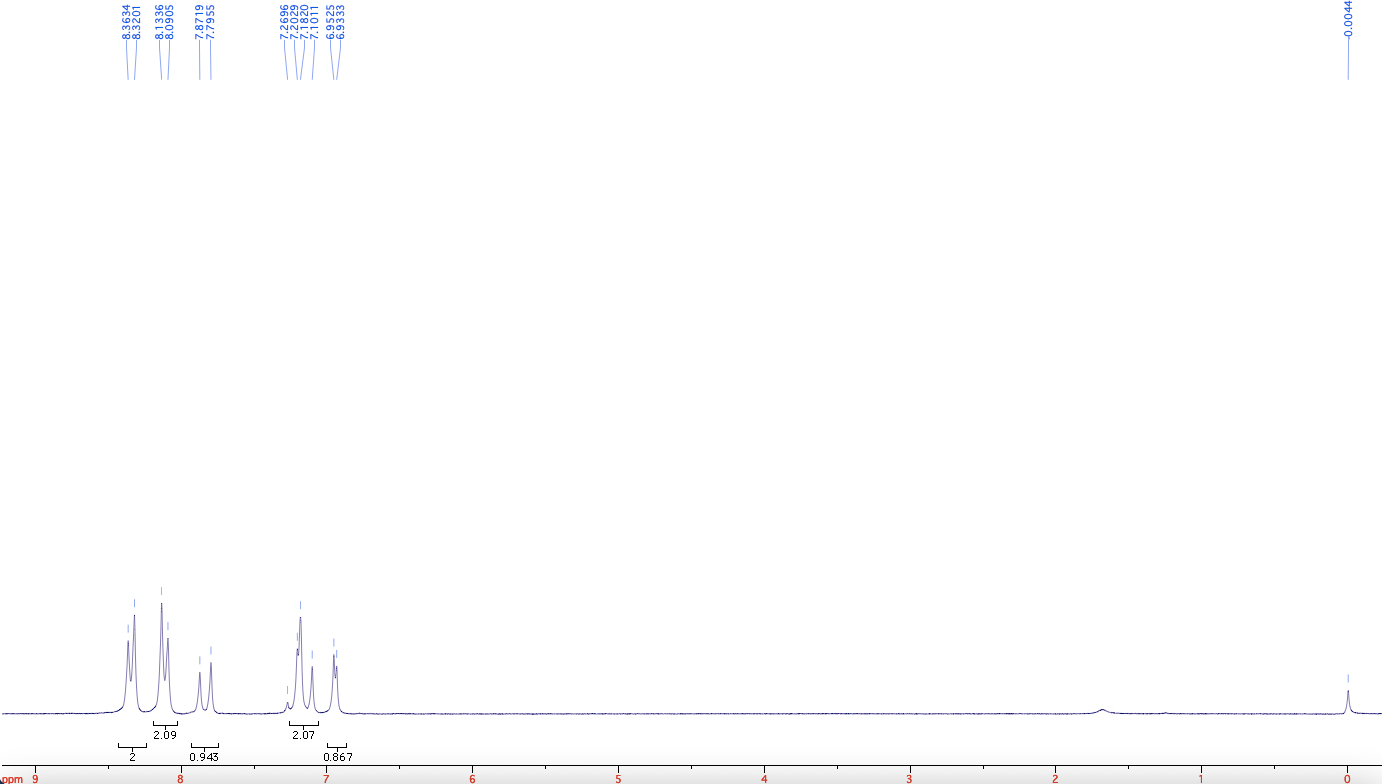
**

**Figure S13.** 13C NMR spectrum (50 MHz, CDCl3) of *(E)-3-(5-chlorothiophen-2-yl)-1-(4-nitrophenyl)prop-2-en-1-one* **(C6)**


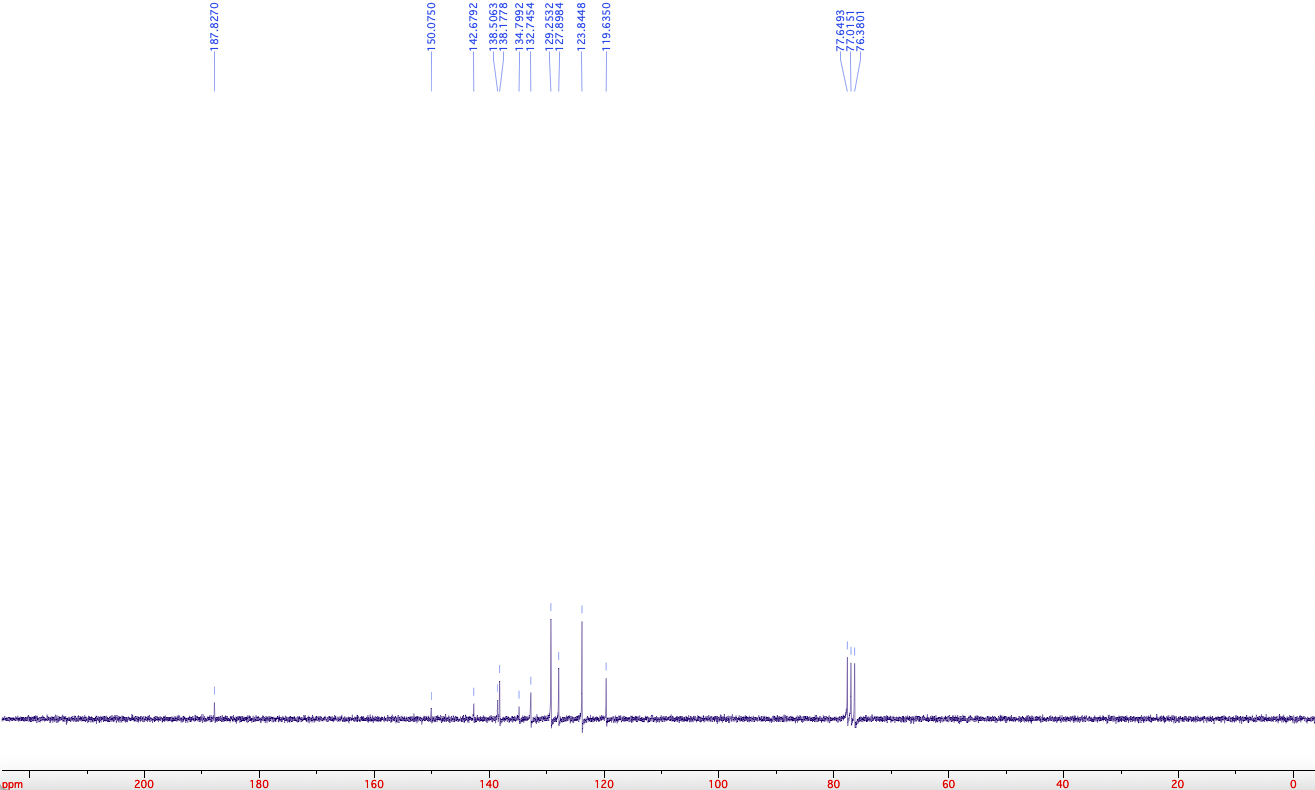


**Figure S14.** 1H NMR spectrum (200 MHz, CDCl3) of *(E)-1-(4-bromophenyl)-3-(5-chlorothiophen-2-yl)prop-2-en-1-one* **(C7)**

**
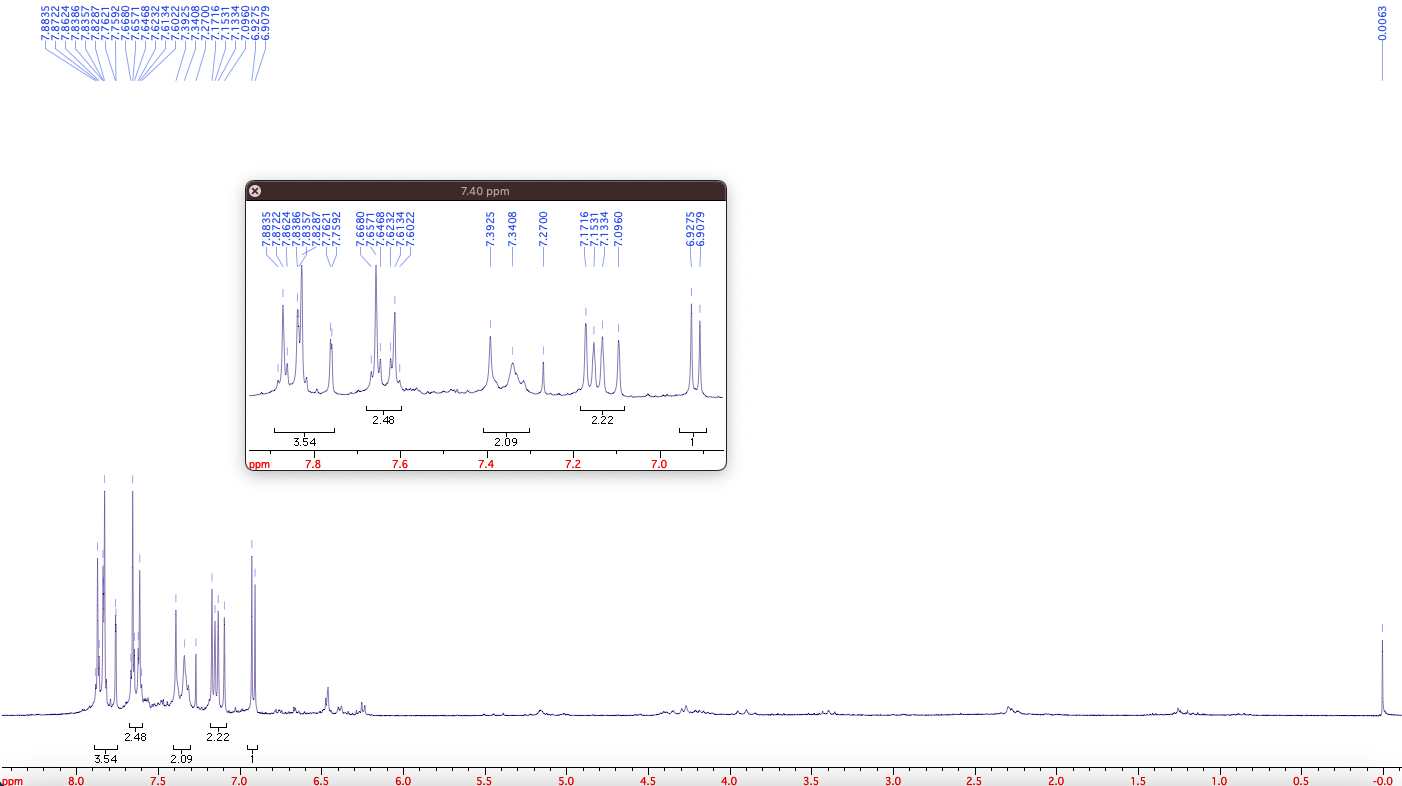
**

**Figure S15.** 13C NMR spectrum (50 MHz, CDCl3) of *(E)-1-(4-bromophenyl)-3-(5-chlorothiophen-2-yl)prop-2-en-1-one* **(C7)**


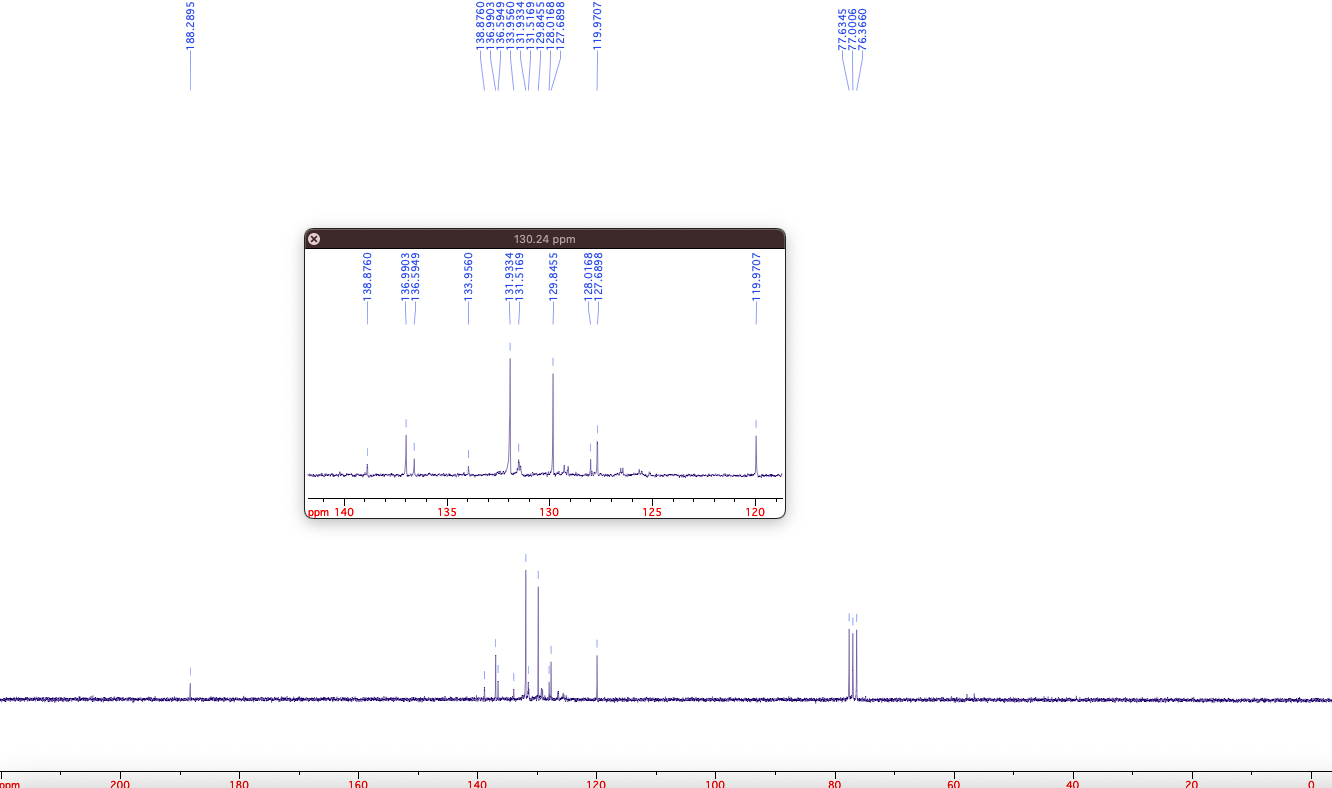


**Figure S16.** DEPT spectrum of *(E)-1-(4-bromophenyl)-3-(5-chlorothiophen-2-yl)prop-2-en-1-one* **(C7)**

**
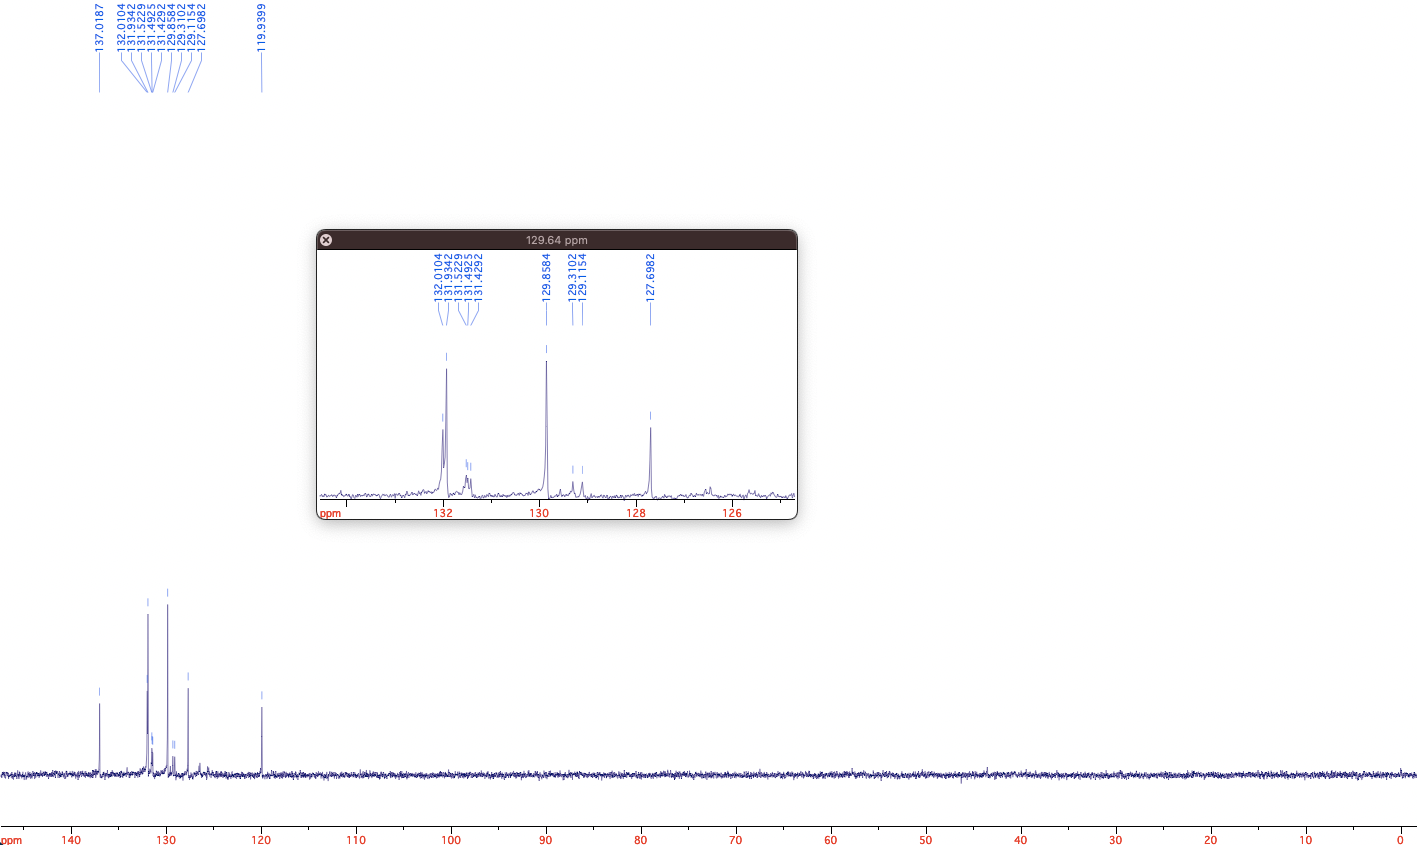
**

**Figure S17.** 1H NMR spectrum (200 MHz, CDCl3) of *(E)-3-(5-chlorothiophen-2-yl)-1-(2,4,5-trimetoxyphenyl)prop-2-en-1-one* **(C8)**

**
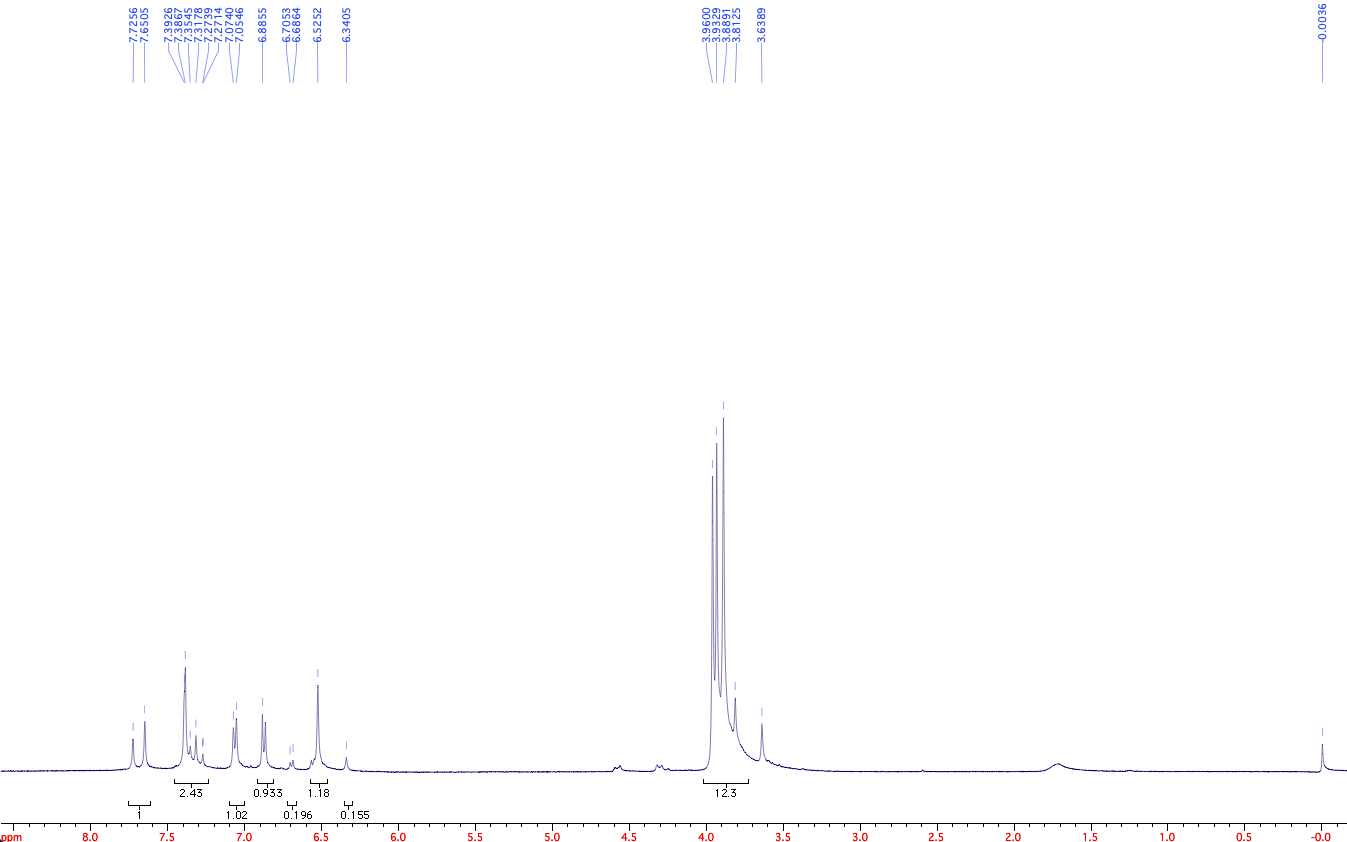
**

**Figure S18.** 13C NMR spectrum (50 MHz, CDCl3) of *(E)-3-(5-chlorothiophen-2-yl)-1-(2,4,5-trimetoxyphenyl)prop-2-en-1-one* **(C8)**

**
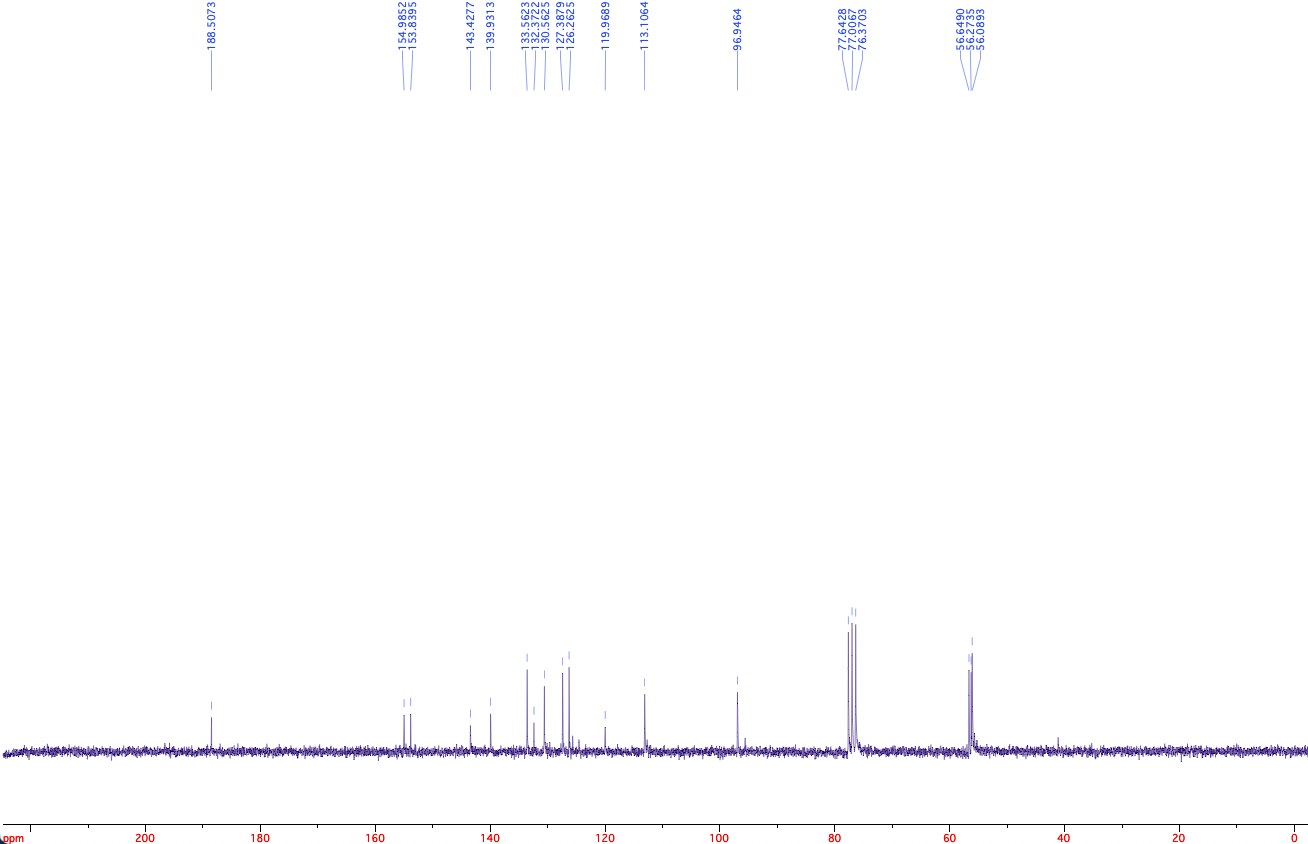
**

**Figure S19.** 1H NMR spectrum (200 MHz, CDCl3) of *(E)-3-(5-chlorothiophen-2-yl)-1-(2,4,6-trimetoxyphenyl)prop-2-en-1-one* **(C9)**

**
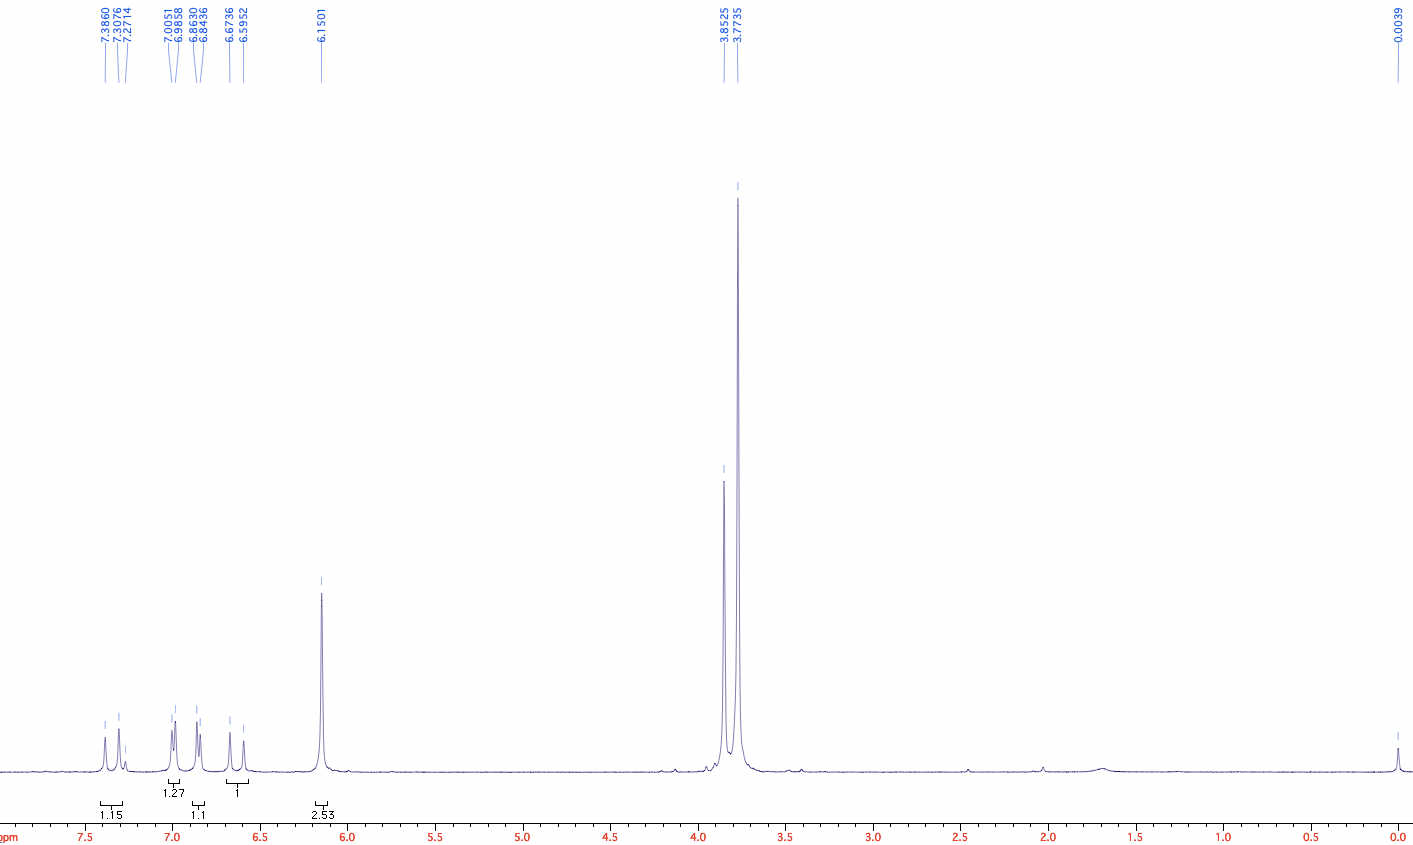
**

**Figure S20.** 13C NMR spectrum (50 MHz, CDCl3) of *(E)-3-(5-chlorothiophen-2-yl)-1-(2,4,6-trimetoxyphenyl)prop-2-en-1-one* **(C9)**

**
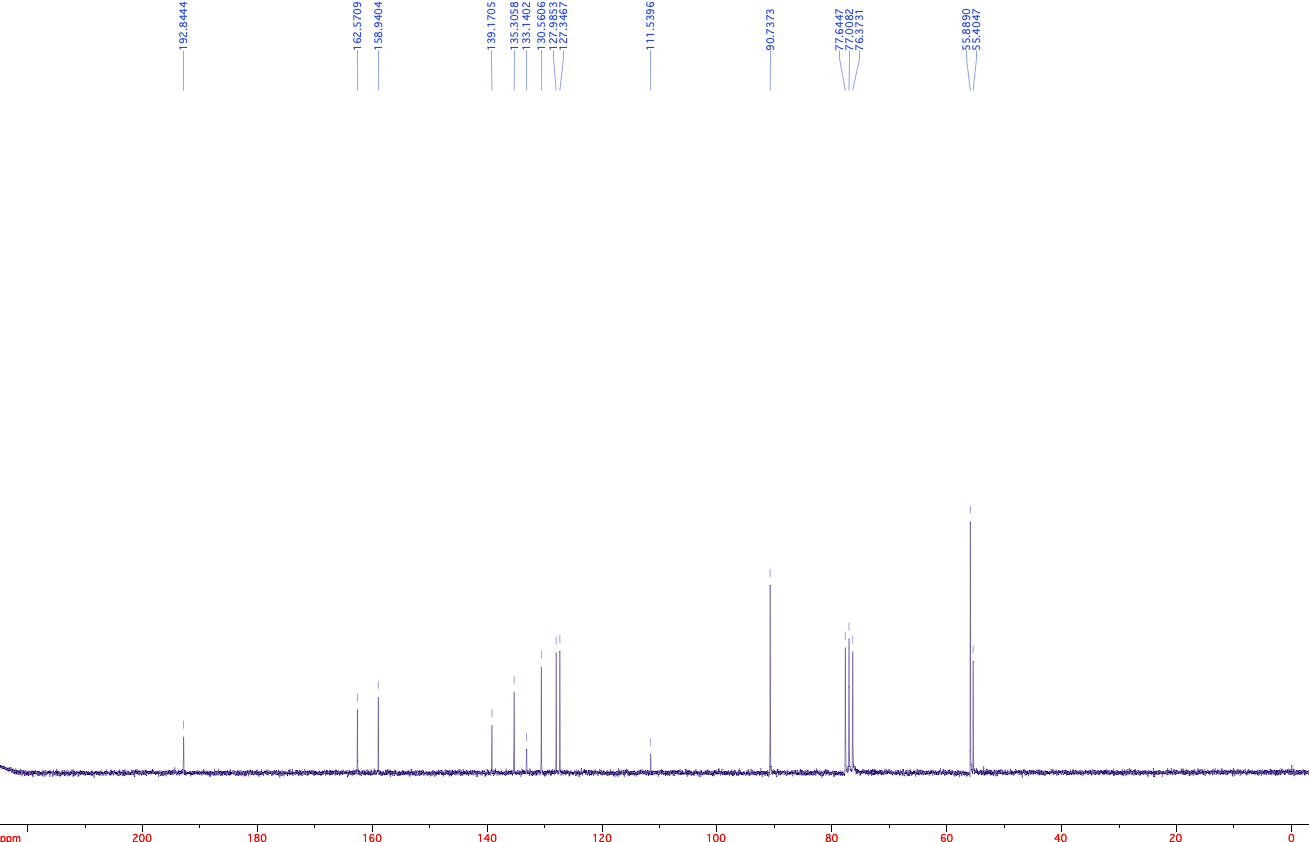
**

**Figure S21.** 1H NMR spectrum (200 MHz, CDCl3) of *(E)-3-(5-chlorothiophen-2-yl)-1-(3,4,5-trimetoxyphenyl)prop-2-en-1-one* **(C10)**

**
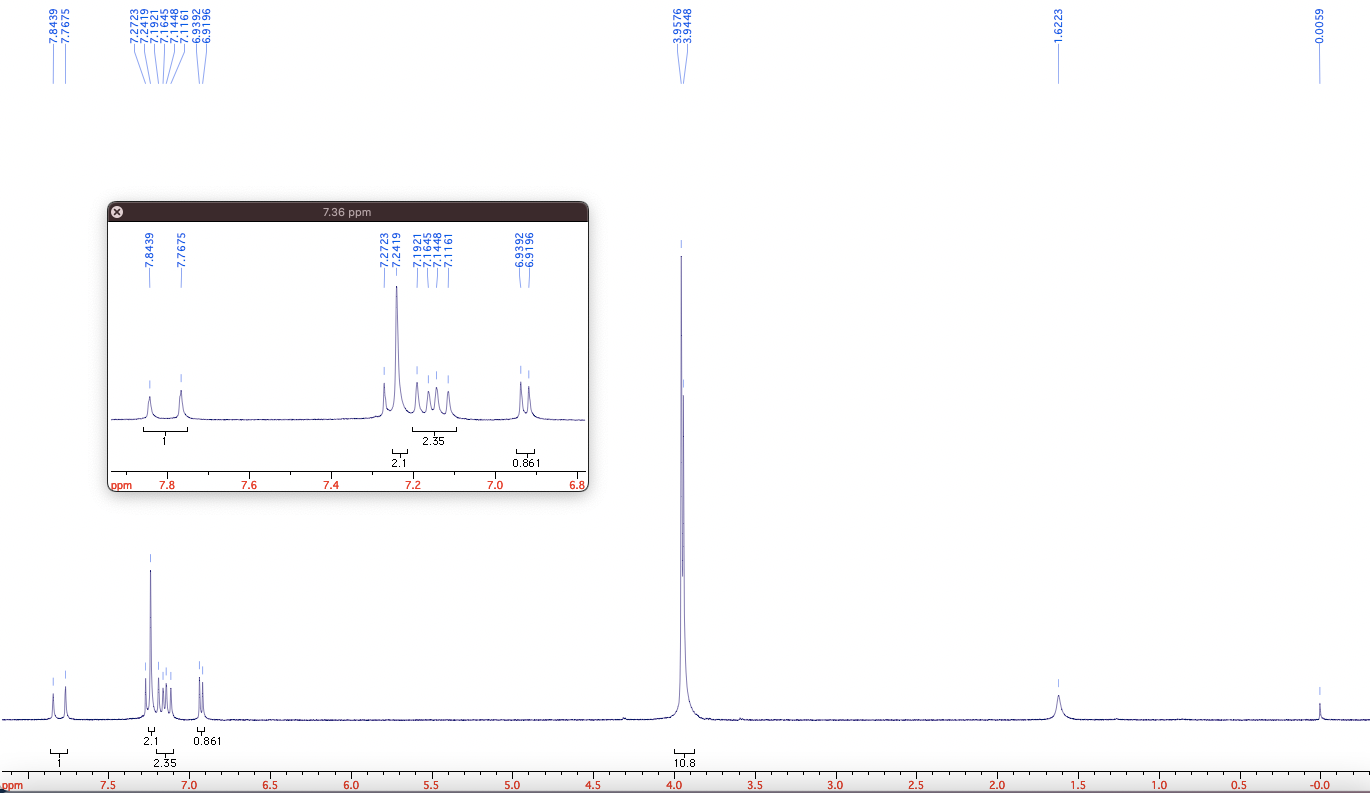
**

**Figure S22.** 13C NMR spectrum (50 MHz, CDCl3) of *(E)-3-(5-chlorothiophen-2-yl)-1-(3,4,5-trimetoxyphenyl)prop-2-en-1-one* **(C10)**

**
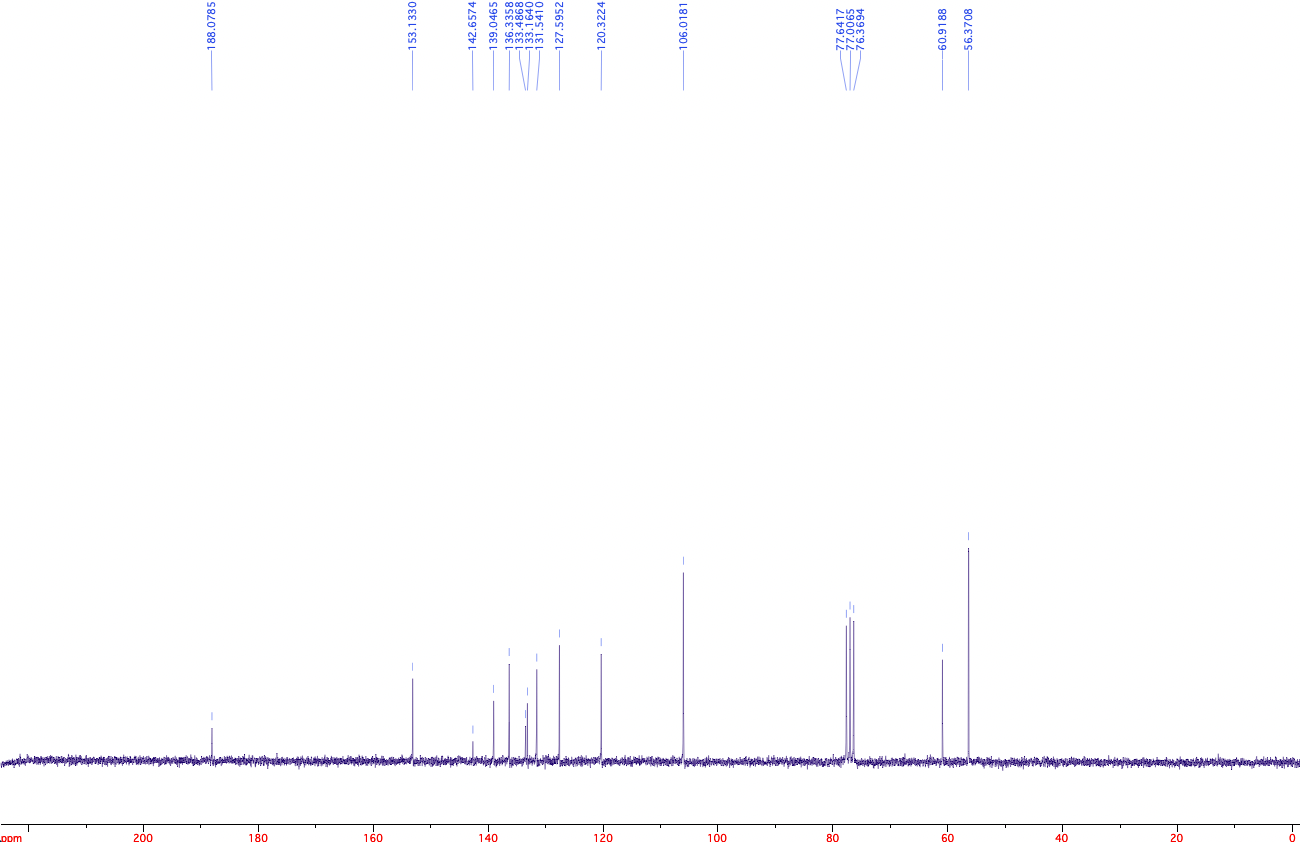
**

**Figure S23.** 1H NMR spectrum (200 MHz, CDCl3) of *(E)-1-(1,3-benzodioxol-5-yl)-3-(5-chlorothiophen-2-yl)prop-2-en-1-one* **(C11)**

**
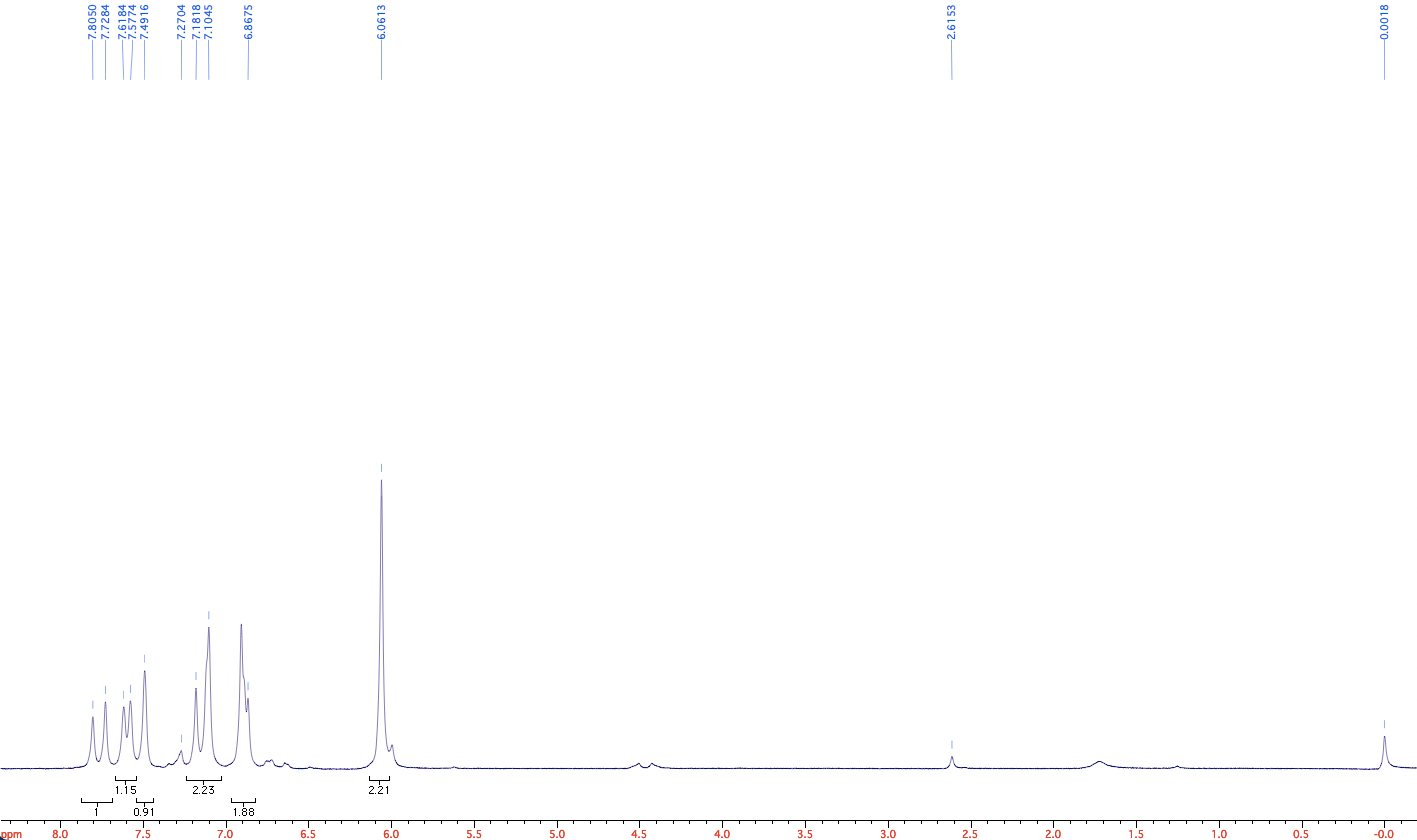
**

**Figure S24.** 13C NMR spectrum (50 MHz, CDCl3) of *(E)-1-(1,3-benzodioxol-5-yl)-3-(5-chlorothiophen-2-yl)prop-2-en-1-one* **(C11)**

**
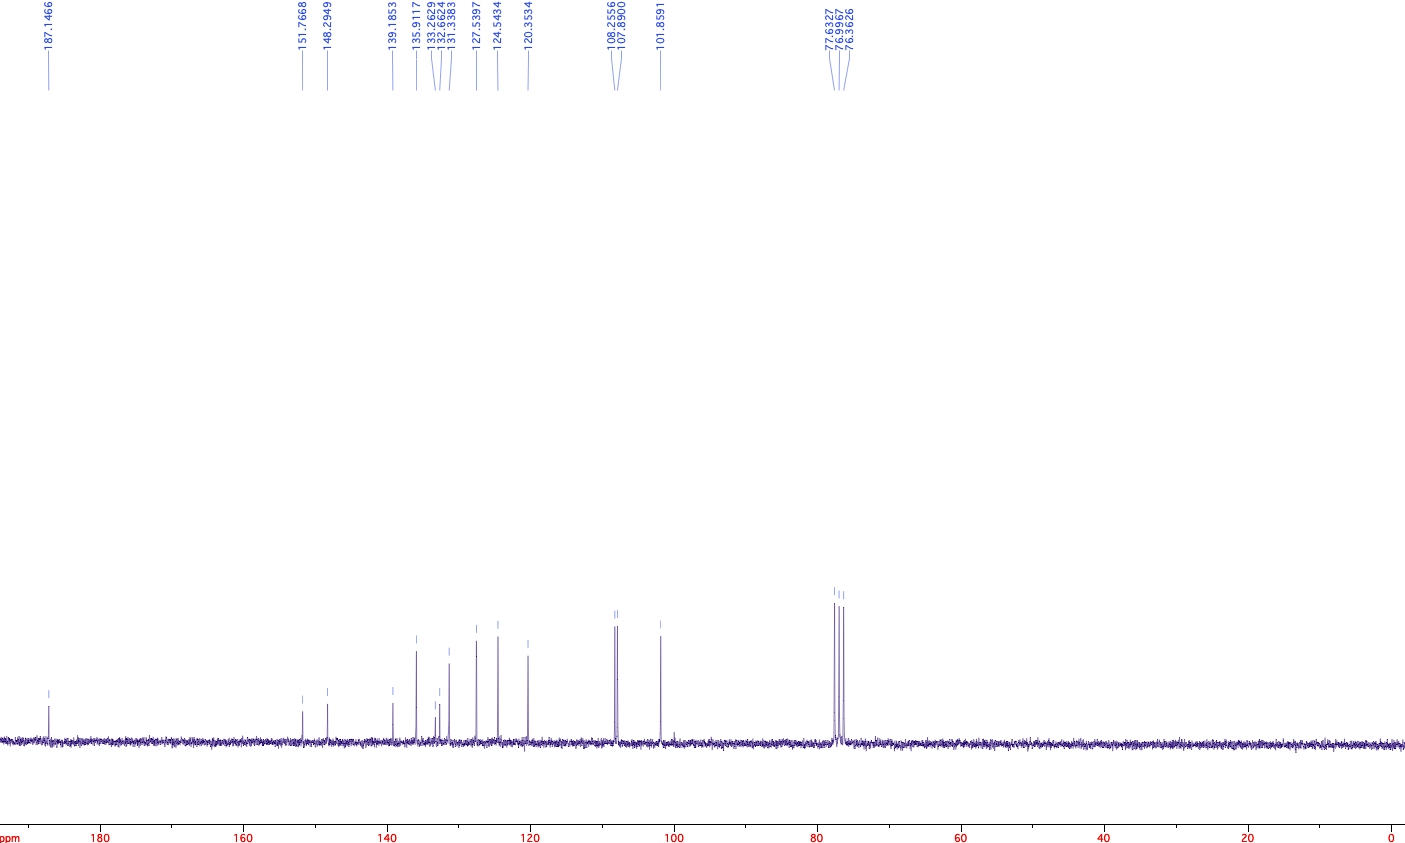
**

**Figure S25.** 1H NMR spectrum (200 MHz, CDCl3) of *(E)-3-(5-chlorothiophen-2-yl)-1-(naphtalen-1-yl)prop-2-en-1-one* **(C12)**

**
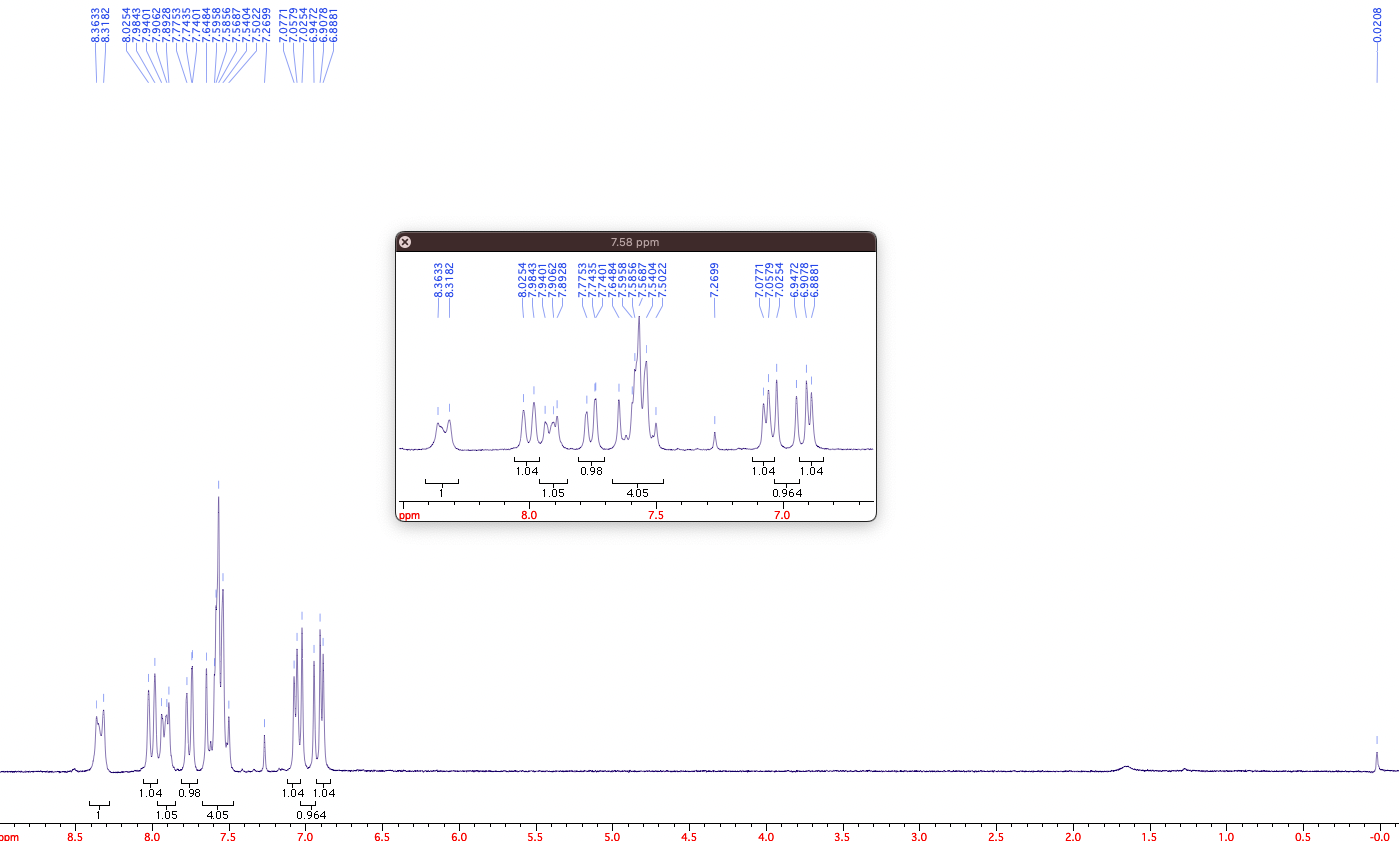
**

**Figure S26.** 13C NMR spectrum (50 MHz, CDCl3) of *(E)-3-(5-chlorothiophen-2-yl)-1-(naphtalen-1-yl)prop-2-en-1-one* **(C12)**

**
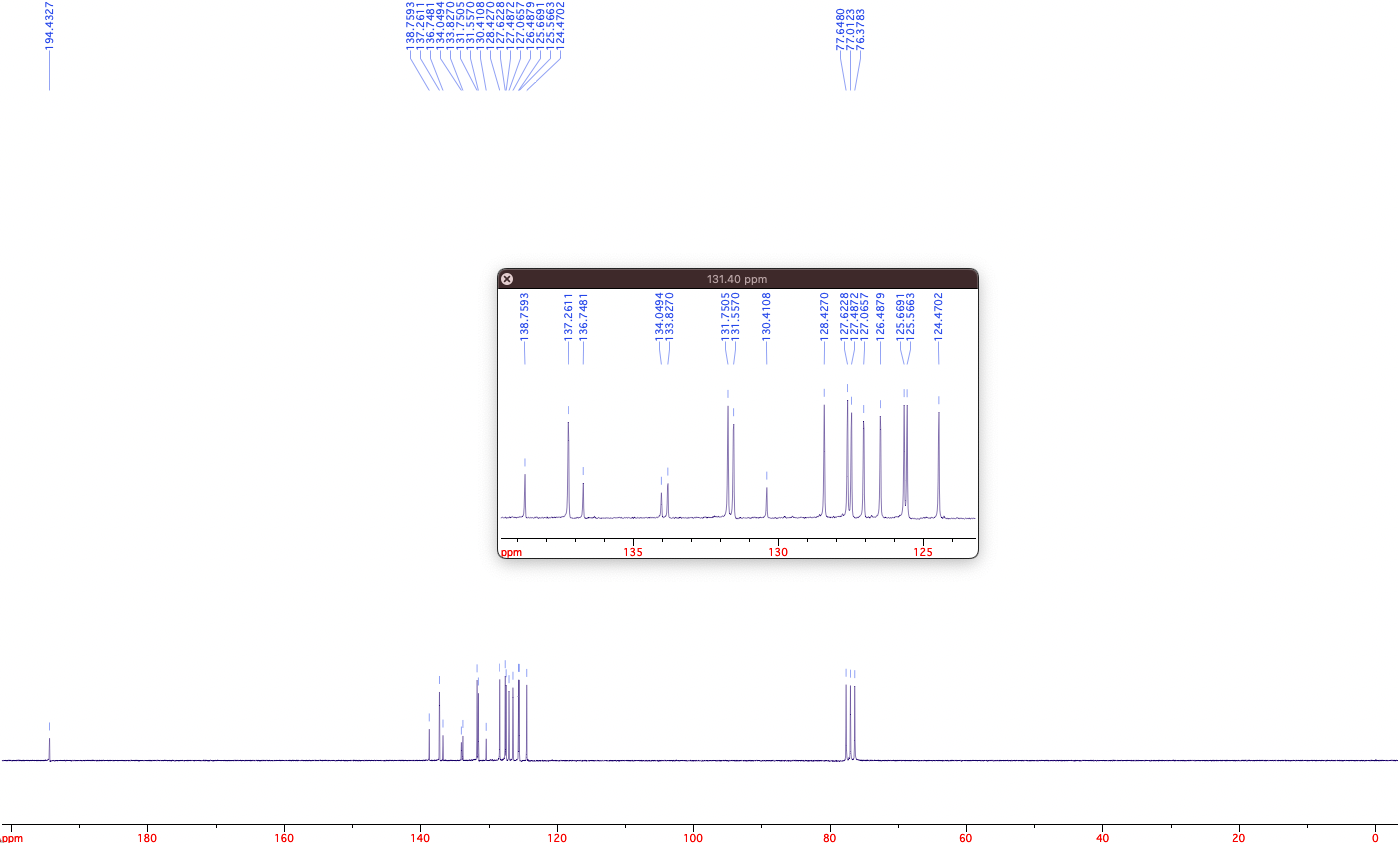
**

**Figure S27.** 1H NMR spectrum (200 MHz, CDCl3) of *(E)-3-(5-chlorothiophen-2-yl)-1-(2,5-dimethoxyphenyl)prop-2-en-1-one* **(C13)**

**
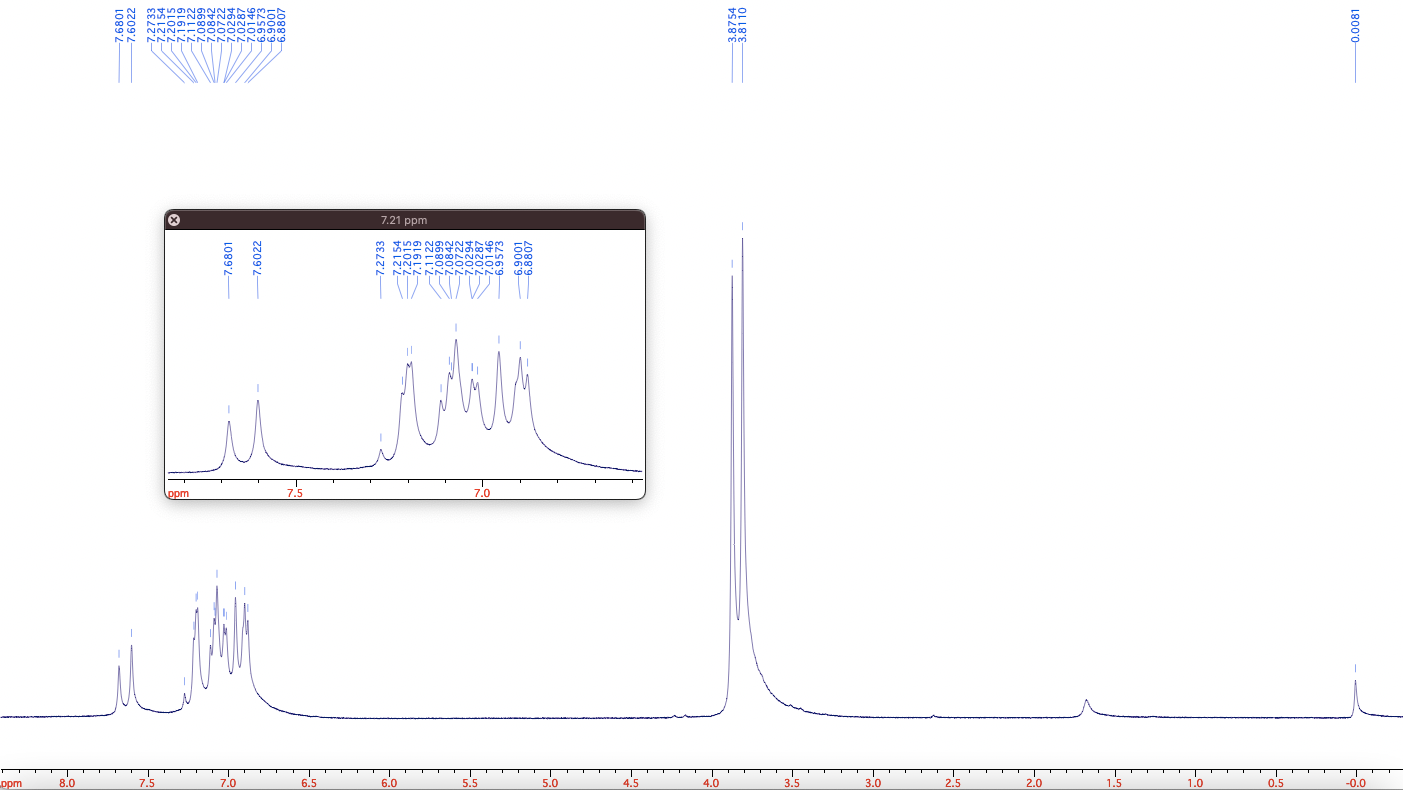
**

**Figure S28.** 13C NMR spectrum (50 MHz, CDCl3) of *(E)-3-(5-chlorothiophen-2-yl)-1-(2,5-dimethoxyphenyl)prop-2-en-1-one* **(C13)**

**
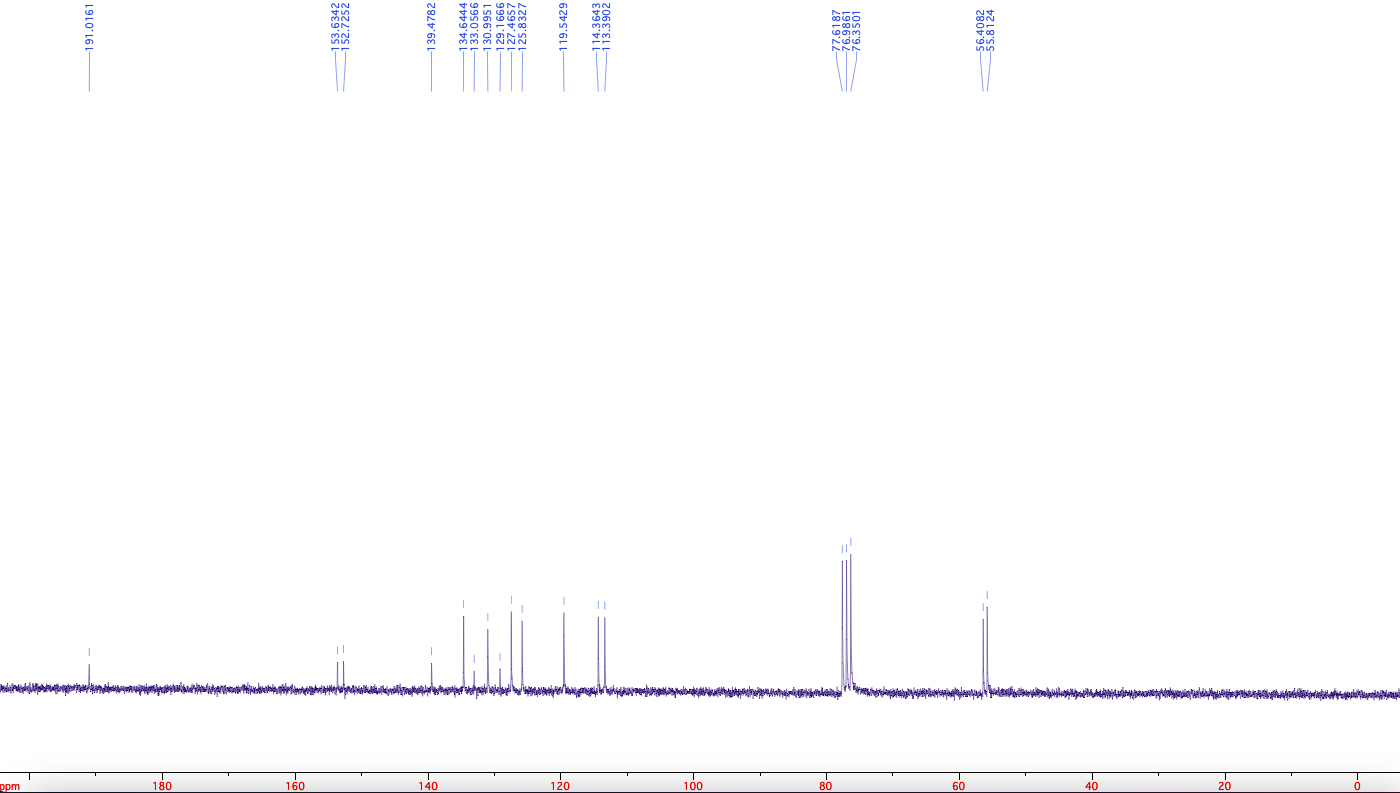
**

**Figure S29.** 1H NMR spectrum (200 MHz, CDCl3) of *(E)-3-(5-chlorothiophen-2-yl)-1-(3,4-dimethoxyfenyl)prop-2-en-1-one* **(C14)**

**
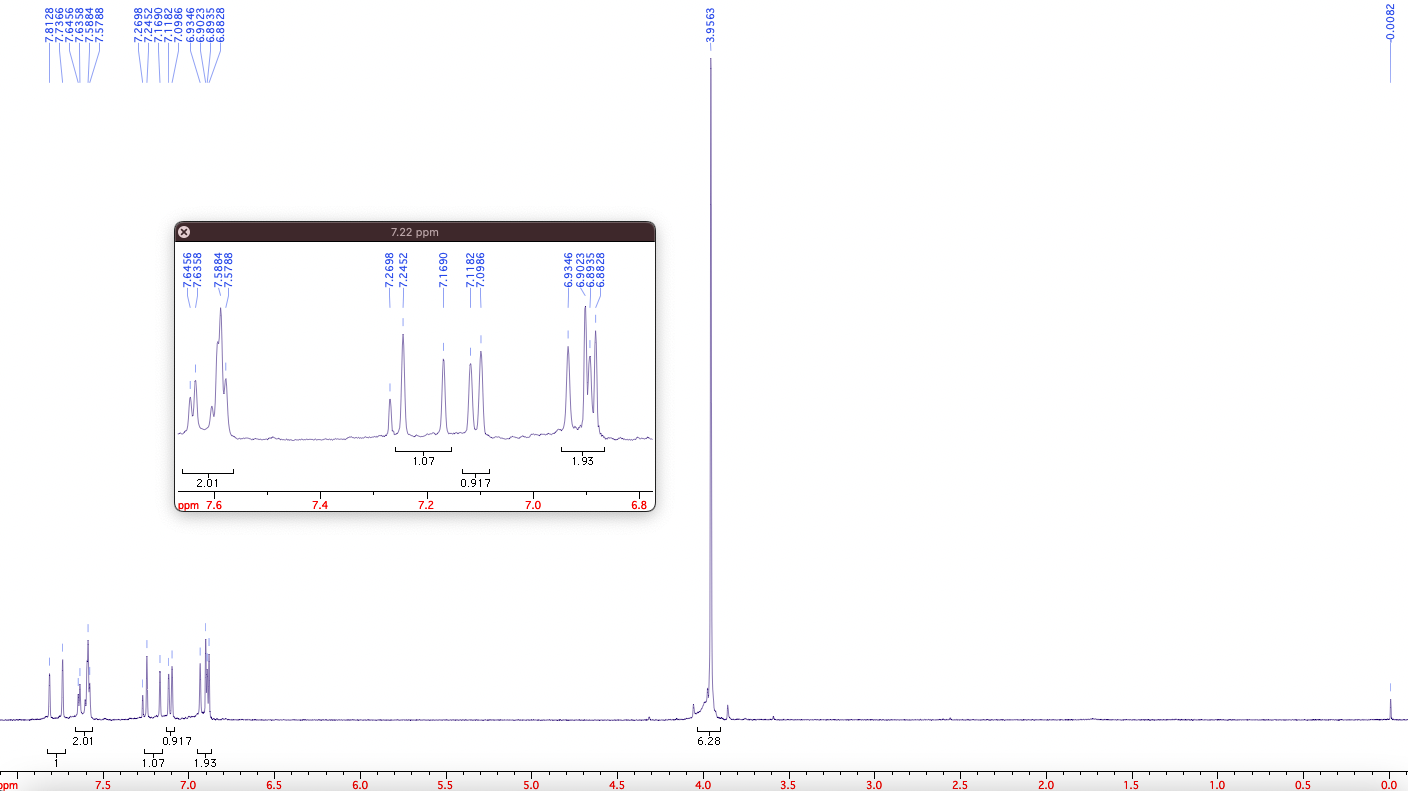
**

**Figure S30.** 13C NMR spectrum (50 MHz, CDCl3) of *(E)-3-(5-chlorothiophen-2-yl)-1-(3,4-dimethoxyfenyl)prop-2-en-1-one* **(C14)**

**
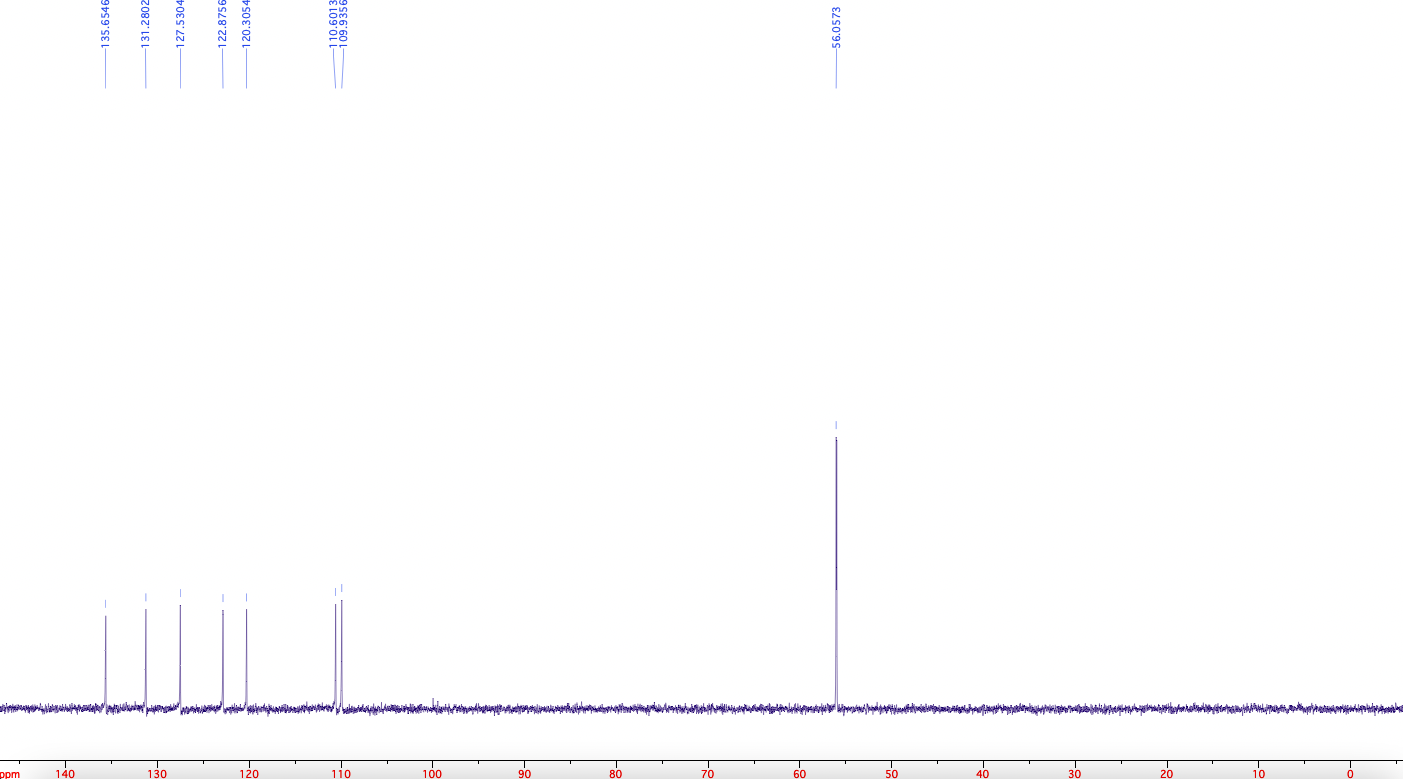
**

**Figure S31.** 1H NMR spectrum (200 MHz, CDCl3) of *(E)-3-(5-chlorothiophen-2-yl)-1-(3-methoxyphenyl)prop-2-en-1-one* **(C15)**

**
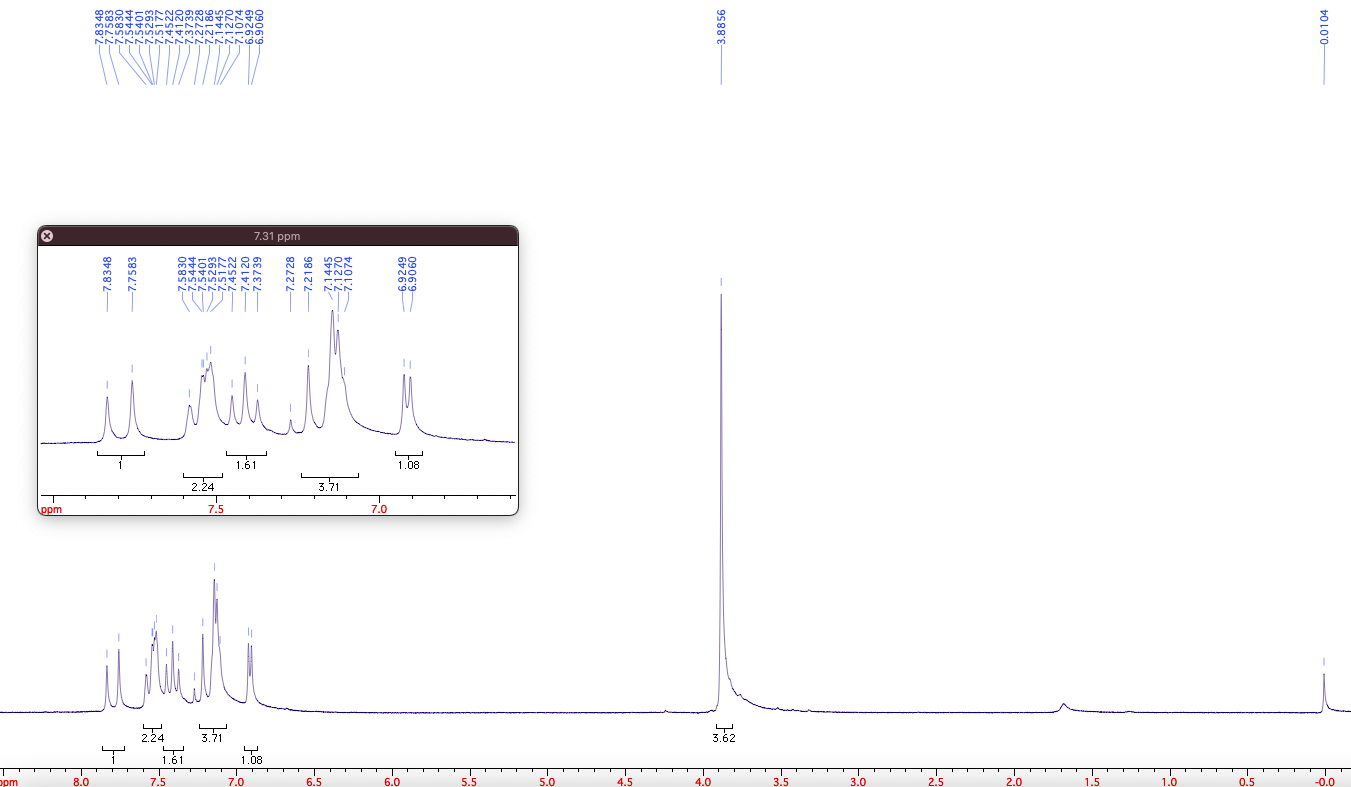
**

**Figure S32.** 13C NMR spectrum (50 MHz, CDCl3) of *(E)-3-(5-chlorothiophen-2-yl)-1-(3-methoxyphenyl)prop-2-en-1-one* **(C15)**

**
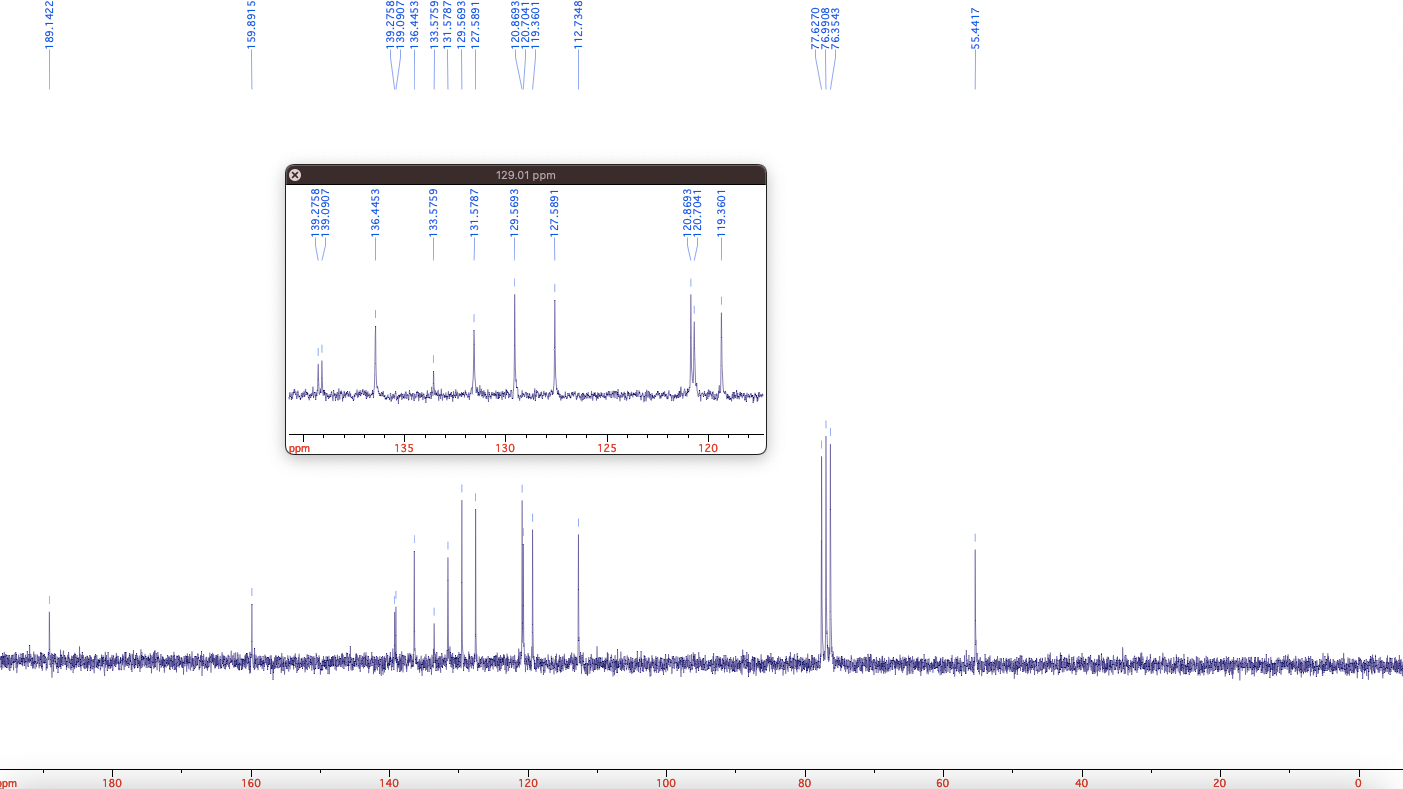
**

**Figure S33.** 1H NMR spectrum (200 MHz, CDCl3) of *(E)-3-(5-chlorothiophen-2-yl)-1-(naphtalen-2-yl)prop-2-en-1-one* **(C16)**

**
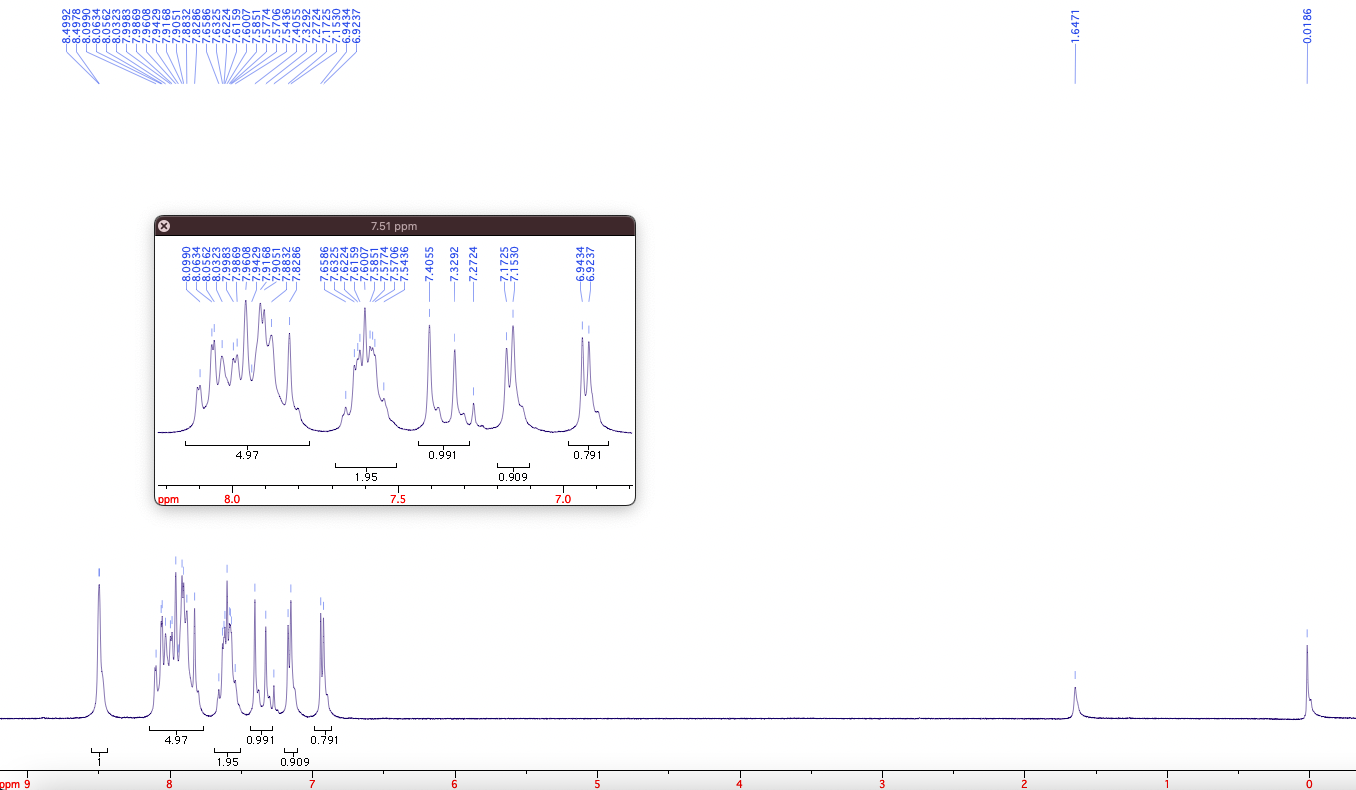
**

**Figure S34.** 13C NMR spectrum (50 MHz, CDCl3) of *(E)-3-(5-chlorothiophen-2-yl)-1-(naphtalen-2-yl)prop-2-en-1-one* **(C16)**


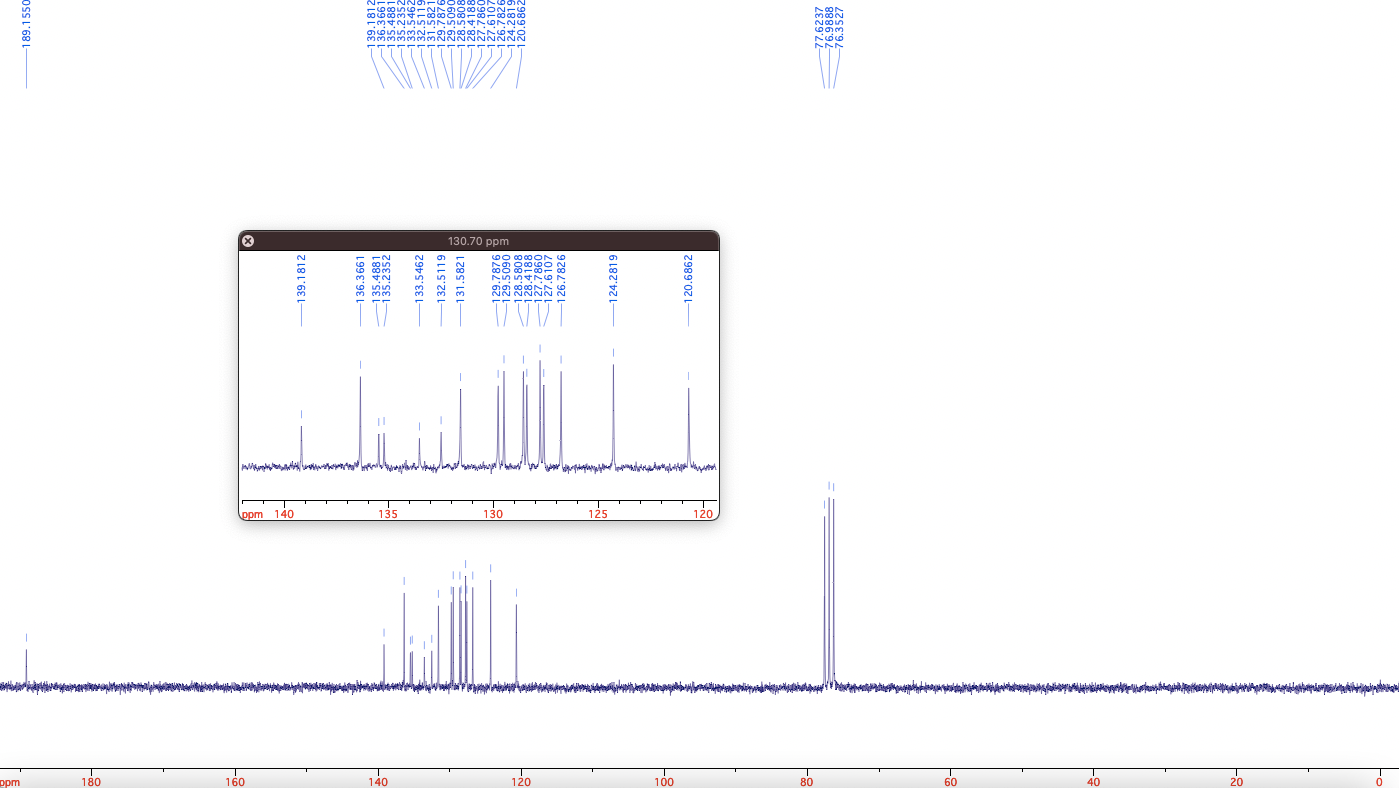


**Figure S35.** 1H NMR spectrum (200 MHz, CDCl3) of *(E)-3-(5-chlorothiophen-2-yl)-1-(2,5-chlorothiophenyl)prop-2-en-1-one* **(C17)**


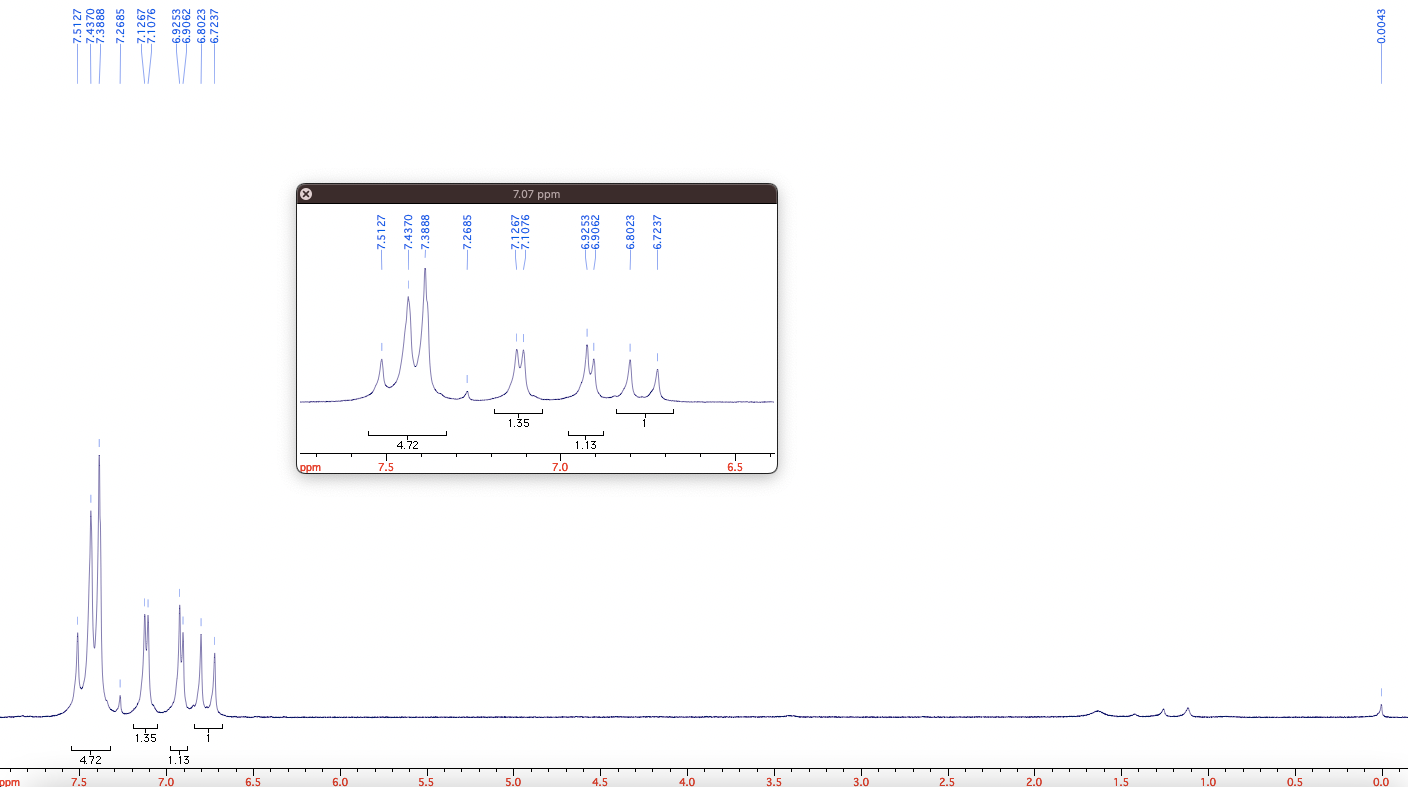


**Figure S36.** 13C NMR spectrum (50 MHz, CDCl3) of *(E)-3-(5-chlorothiophen-2-yl)-1-(2,5-chlorothiophenyl)prop-2-en-1-one* **(C17)**


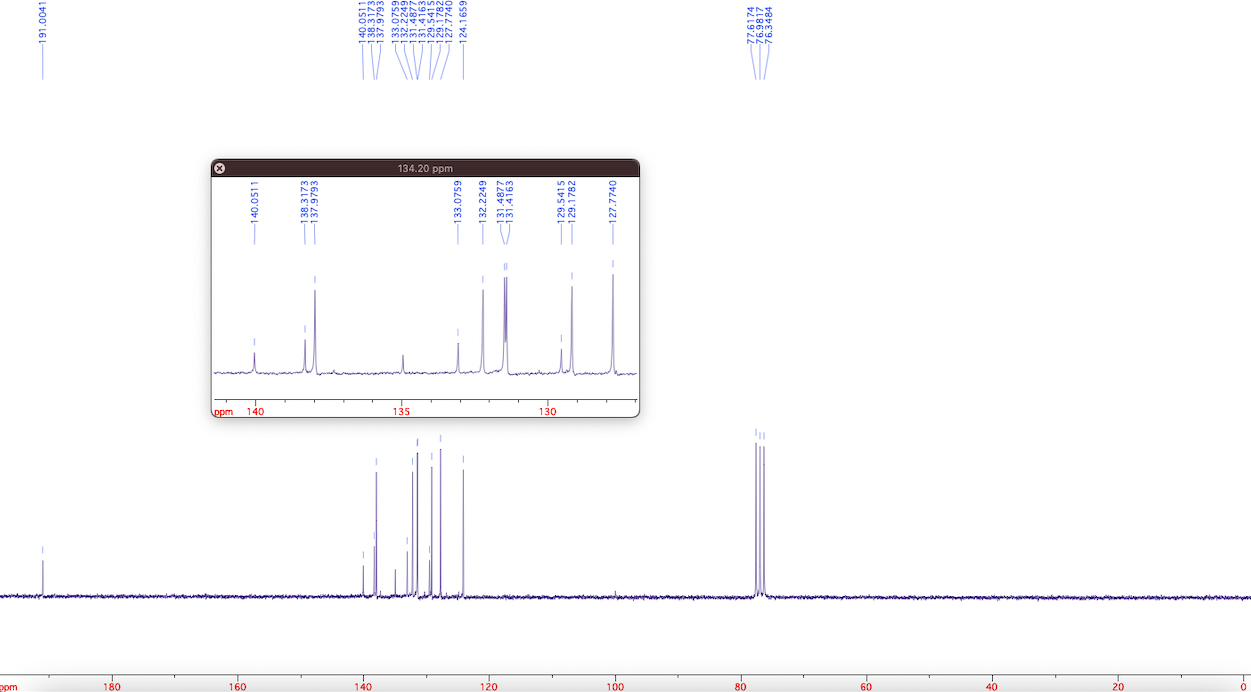

Supplement: Supplementary file 1 [file 35084569]
